# Supplementary material for: Trapping of Ag+ into a Perfect Six-Coordinated Environment: Structural Analysis, Quantum Chemical Calculations and Electrochemistry
Source: MDPI journal article supplement (doi:10.3390/molecules27206961), 2022-10-17
Supplement: s1 [file s1]

# Trapping of Ag<sup>+</sup> into a perfect six-coordinated environment: structural analysis, quantum chemical calculations and electrochemistry

Veronika I. Komlyagina <sup>1,2</sup>, Nikolay F. Romashev <sup>1</sup>, Vasily V. Kokovkin <sup>1</sup>, Artem L. Gushchin <sup>1,\*</sup>, Enrico Benassi <sup>2,\*</sup>, Maxim N. Sokolov <sup>1</sup> and Pavel A. Abramov <sup>1,3,\*</sup>

## Supplementary Materials

### Table of contents

|                                                                                                                                                                                                                                                                                                                                                                                                                                                                                 |    |
|---------------------------------------------------------------------------------------------------------------------------------------------------------------------------------------------------------------------------------------------------------------------------------------------------------------------------------------------------------------------------------------------------------------------------------------------------------------------------------|----|
| <b>Table S1.</b> Experimental details.....                                                                                                                                                                                                                                                                                                                                                                                                                                      | 2  |
| <b>Table S2.</b> Selected geometric parameters (Å) .....                                                                                                                                                                                                                                                                                                                                                                                                                        | 3  |
| <b>Figure S1.</b> X-ray powder diffraction patterns comparison.....                                                                                                                                                                                                                                                                                                                                                                                                             | 4  |
| <b>Table S3.</b> Shape results .....                                                                                                                                                                                                                                                                                                                                                                                                                                            | 4  |
| <b>Table S4.</b> NBO analysis. Ag-involving interactions. ....                                                                                                                                                                                                                                                                                                                                                                                                                  | 5  |
| <b>Table S5.</b> Occupancy and composition of Ag NBOs. ....                                                                                                                                                                                                                                                                                                                                                                                                                     | 6  |
| <b>Table S6.</b> Topological properties computed at the atomic (A), bond (B), ring (R) and cage critical points (C), viz. total electron density (ρ <sub>tot</sub> ), Lagrangian kinetic energy (G), Hamiltonian kinetic energy (K), potential energy (V), energy density (H), Laplacian of the total electron density (Δρ <sub>tot</sub> ), Source Function (SF), total Electrostatic Potential (EP <sub>Stot</sub> ), ellipticity of electron density (ε) and eta index (η) 7 |    |
| <b>Figure S2.</b> Comparison of CVs of paste electrodes in 0.10 M Bu <sub>4</sub> NPF <sub>6</sub> in acetonitrile at a scan rate of 20 mV/s: red curve - complex in paste, blue curve - precursor, green curve - background (blank).....                                                                                                                                                                                                                                       | 13 |
| <b>Figure S3.</b> Reproducibility of CV curves (2-4 cycles) for <b>1</b> in the paste electrode in aqueous solution of 1.0 M KHCO <sub>3</sub> at different scan rates (mV/s): blue line – 10, red – 20, green – 50, yellow – 100. ....                                                                                                                                                                                                                                         | 14 |
| <b>Figure S4.</b> The dependences of peak currents on the square root of scan rate for anodic (green circles) and cathodic (blue circles) peak currents. The primary data presented in Figure S3.....                                                                                                                                                                                                                                                                           | 15 |
| <b>Figure S5.</b> IR spectra of <b>1</b> (black curve) and (Bu <sub>4</sub> N) <sub>4</sub> [β-Mo <sub>8</sub> O <sub>26</sub> ] (red curve).....                                                                                                                                                                                                                                                                                                                               | 16 |
| <b>Figure S6.</b> TGA data for <b>1</b> . ....                                                                                                                                                                                                                                                                                                                                                                                                                                  | 10 |

**Table S1.** Experimental details

|                                                                            | <b>1</b>                                                                                                                     |
|----------------------------------------------------------------------------|------------------------------------------------------------------------------------------------------------------------------|
| Chemical formula                                                           | C <sub>104</sub> H <sub>152</sub> Ag <sub>2</sub> Mo <sub>8</sub> N <sub>6</sub> O <sub>26</sub>                             |
| $M_r$                                                                      | 2885.57                                                                                                                      |
| Crystal system, space group                                                | Monoclinic, <i>C2/c</i>                                                                                                      |
| Temperature (K)                                                            | 150                                                                                                                          |
| $a, b, c$ (Å)                                                              | 38.5675 (16), 12.6898 (6), 26.2540 (11)                                                                                      |
| $\beta$ (°)                                                                | 116.858 (1)                                                                                                                  |
| $V$ (Å <sup>3</sup> )                                                      | 11463.0 (9)                                                                                                                  |
| $Z$                                                                        | 4                                                                                                                            |
| Radiation type                                                             | Mo <i>Ka</i>                                                                                                                 |
| $\mu$ (mm <sup>-1</sup> )                                                  | 1.25                                                                                                                         |
| Crystal size (mm)                                                          | 0.14 × 0.13 × 0.09                                                                                                           |
| Diffractometer                                                             | Bruker D8 Venture diffractometer                                                                                             |
| Absorption correction                                                      | Multi-scan<br><i>SADABS</i> 2016/2: Krause, L., Herbst-Irmer, R., Sheldrick G.M. & Stalke D., J. Appl. Cryst. 48 (2015) 3-10 |
| $T_{\min}, T_{\max}$                                                       | 0.643, 0.746                                                                                                                 |
| No. of measured, independent and observed [ $I > 2\sigma(I)$ ] reflections | 71574, 18991, 14894                                                                                                          |
| $R_{\text{int}}$                                                           | 0.042                                                                                                                        |
| $\theta$ values (°)                                                        | $\theta_{\max} = 31.5$ , $\theta_{\min} = 2.0$                                                                               |
| $(\sin \theta/\lambda)_{\max}$ (Å <sup>-1</sup> )                          | 0.736                                                                                                                        |
| Range of $h, k, l$                                                         | $-56 \leq h \leq 56$ , $-18 \leq k \leq 14$ , $-36 \leq l \leq 38$                                                           |
| $R[F^2 > 2\sigma(F^2)]$ , $wR(F^2)$ , $S$                                  | 0.036, 0.087, 1.09                                                                                                           |
| No. of reflections, parameters, restraints                                 | 18991, 744, 18                                                                                                               |
| H-atom treatment                                                           | H-atom parameters constrained                                                                                                |
| Weighting scheme                                                           | $w = 1/[\sigma^2(F_o^2) + (0.03129P)^2 + 1.7353P]$<br>where $P = (F_o^2 + 2F_c^2)/3$                                         |
| $\Delta\rho_{\max}, \Delta\rho_{\min}$ (e Å <sup>-3</sup> )                | 0.78, -0.64                                                                                                                  |

Computer programs: *APEX3* (Bruker-AXS, 2016), *SAINT* (Bruker-AXS, 2016), *SHELXT* 2014/5 (Sheldrick, 2014), *SHELXL2017/1* (Sheldrick, 2017).

**Table S2.** Selected geometric parameters (Å)

|                     |             |                      |             |
|---------------------|-------------|----------------------|-------------|
| O2—Ag1              | 2.5693 (17) | O4—Mo3               | 2.4739 (15) |
| O6—Ag1              | 2.5437 (18) | O4—Mo4               | 2.3195 (15) |
| O8—Ag1              | 2.5398 (19) | O5—Mo2               | 1.6979 (17) |
| O10—Ag1             | 2.4948 (17) | O6—Mo2               | 1.7114 (17) |
| N1—Ag1              | 2.461 (2)   | O7—Mo2               | 1.8932 (16) |
| N2—Ag1              | 2.386 (2)   | O7—Mo3               | 1.9154 (16) |
| O1—Mo1              | 1.7458 (16) | O8—Mo3               | 1.7127 (18) |
| O1—Mo3 <sup>i</sup> | 2.2973 (17) | O9—Mo3               | 1.6964 (18) |
| O2—Mo1              | 1.7005 (17) | O10—Mo4              | 1.7074 (17) |
| O3—Mo1              | 1.9446 (16) | O11—Mo1              | 1.9480 (16) |
| O3—Mo2              | 2.0061 (16) | O11—Mo2 <sup>i</sup> | 2.3092 (16) |
| O3—Mo4 <sup>i</sup> | 2.3020 (16) | O11—Mo4              | 2.0028 (16) |
| O4—Mo1              | 2.1531 (15) | O12—Mo3              | 1.9204 (17) |
| O4—Mo1 <sup>i</sup> | 2.3343 (15) | O12—Mo4              | 1.9010 (16) |
| O4—Mo2              | 2.3060 (15) | O13—Mo4              | 1.7000 (17) |

Symmetry code(s): (i)  $-x+1, -y+1, -z+1$ .

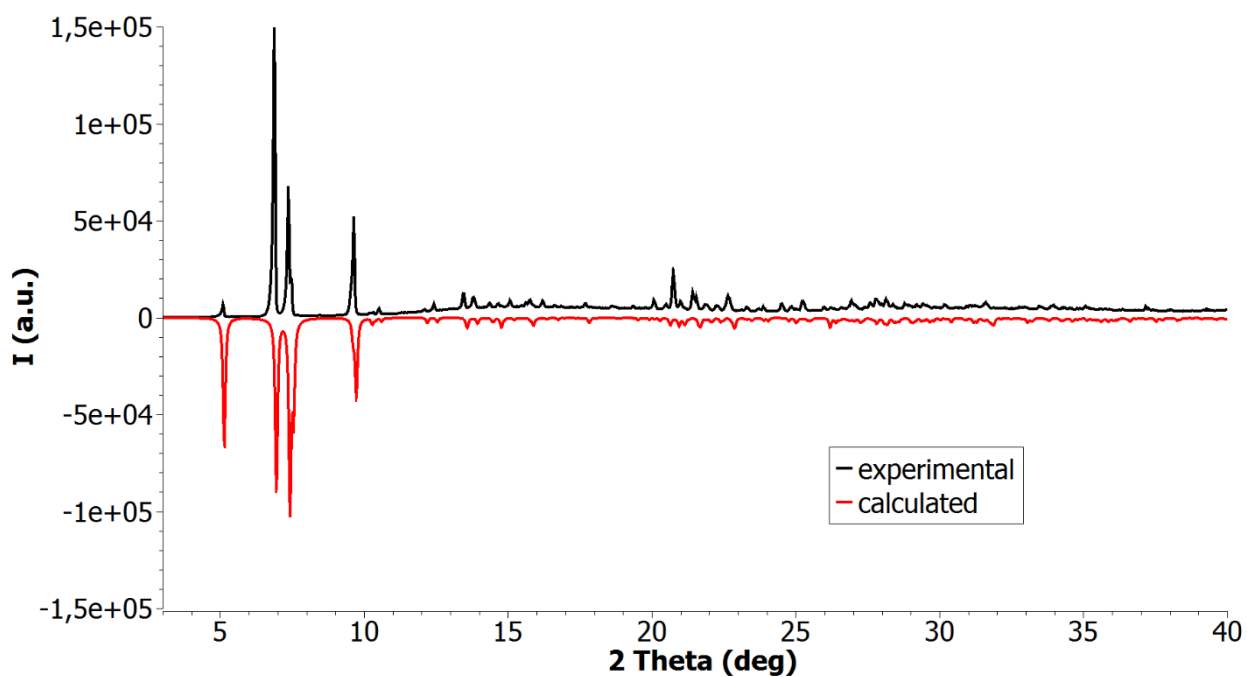

**Figure S1.** X-ray powder diffraction patterns comparison.

**Table S3.** Shape results

---

S H A P E v2.1      Continuous Shape Measures calculation  
(c) 2013 Electronic Structure Group, Universitat de Barcelona  
Contact: llunell@ub.edu

---

|        |       |                               |
|--------|-------|-------------------------------|
| HP-6   | 1 D6h | Hexagon                       |
| PPY-6  | 2 C5v | Pentagonal pyramid            |
| OC-6   | 3 Oh  | Octahedron                    |
| TPR-6  | 4 D3h | Trigonal prism                |
| JPPY-6 | 5 C5v | Johnson pentagonal pyramid J2 |

| Structure [ML6 ] | HP-6 | PPY-6   | OC-6   | TPR-6   | JPPY-6        |
|------------------|------|---------|--------|---------|---------------|
| struct1          | ,    | 30.590, | 7.938, | 12.027, | 7.827, 11.118 |

Table S4. NBO analysis. Ag-involving interactions.

|     |    | Donor     |    |      |     | Acceptor  | $E^{(2)} / (\text{kcal}\cdot\text{mol}^{-1})$ |
|-----|----|-----------|----|------|-----|-----------|-----------------------------------------------|
| 301 | CR | ( Ag )    | -> | 1952 | RY* | ( C )     | 283.65                                        |
| 432 | LP | ( Ag )    | -> | 1814 | RY* | ( C )     | 170.37                                        |
| 434 | LP | ( Ag )    | -> | 1579 | RY* | ( C )     | 63.33                                         |
| 434 | LP | ( Ag )    | -> | 1715 | RY* | ( C )     | 101.39                                        |
| 434 | LP | ( Ag )    | -> | 1718 | RY* | ( C )     | 66.67                                         |
| 434 | LP | ( Ag )    | -> | 1751 | RY* | ( C )     | 78.61                                         |
| 434 | LP | ( Ag )    | -> | 1755 | RY* | ( C )     | 58.41                                         |
| 434 | LP | ( Ag )    | -> | 1964 | RY* | ( C )     | 225.68                                        |
| 434 | LP | ( Ag )    | -> | 1970 | RY* | ( C )     | 190.96                                        |
| 436 | LP | ( Ag )    | -> | 1814 | RY* | ( C )     | 63.37                                         |
| 303 | CR | ( Ag )    | -> | 2133 | BD* | ( C - C ) | 71.36                                         |
| 421 | LP | ( O )     | -> | 1275 | RY* | ( Ag )    | 60.77                                         |
| 422 | LP | ( O )     | -> | 1275 | RY* | ( Ag )    | 90.72                                         |
| 463 | LP | ( O )     | -> | 1275 | RY* | ( Ag )    | 80.52                                         |
| 458 | LP | ( N )     | -> | 1275 | RY* | ( Ag )    | 58.55                                         |
| 348 | CR | ( C )     | -> | 1275 | RY* | ( Ag )    | 83.77                                         |
| 348 | CR | ( C )     | -> | 1276 | RY* | ( Ag )    | 58.82                                         |
| 348 | CR | ( C )     | -> | 1280 | RY* | ( Ag )    | 130.10                                        |
| 350 | CR | ( C )     | -> | 1274 | RY* | ( Ag )    | 55.61                                         |
| 353 | CR | ( C )     | -> | 1276 | RY* | ( Ag )    | 50.64                                         |
| 353 | CR | ( C )     | -> | 1279 | RY* | ( Ag )    | 283.48                                        |
| 353 | CR | ( C )     | -> | 1280 | RY* | ( Ag )    | 199.58                                        |
| 355 | CR | ( C )     | -> | 1275 | RY* | ( Ag )    | 183.46                                        |
| 355 | CR | ( C )     | -> | 1278 | RY* | ( Ag )    | 115.75                                        |
| 355 | CR | ( C )     | -> | 1279 | RY* | ( Ag )    | 538.10                                        |
| 355 | CR | ( C )     | -> | 1280 | RY* | ( Ag )    | 389.56                                        |
| 359 | CR | ( C )     | -> | 1274 | RY* | ( Ag )    | 102.35                                        |
| 359 | CR | ( C )     | -> | 1280 | RY* | ( Ag )    | 70.78                                         |
| 366 | CR | ( C )     | -> | 1274 | RY* | ( Ag )    | 59.77                                         |
| 366 | CR | ( C )     | -> | 1279 | RY* | ( Ag )    | 104.30                                        |
| 366 | CR | ( C )     | -> | 1280 | RY* | ( Ag )    | 128.04                                        |
| 367 | CR | ( C )     | -> | 1275 | RY* | ( Ag )    | 151.82                                        |
| 368 | CR | ( C )     | -> | 1278 | RY* | ( Ag )    | 72.95                                         |
| 368 | CR | ( C )     | -> | 1279 | RY* | ( Ag )    | 149.13                                        |
| 368 | CR | ( C )     | -> | 1280 | RY* | ( Ag )    | 69.20                                         |
| 311 | CR | ( Mo )    | -> | 1280 | RY* | ( Ag )    | 275.42                                        |
| 315 | CR | ( Mo )    | -> | 1280 | RY* | ( Ag )    | 60.83                                         |
| 246 | CR | ( Mo )    | -> | 1280 | RY* | ( Ag )    | 60.98                                         |
| 25  | BD | ( N - C ) | -> | 1275 | RY* | ( Ag )    | 110.62                                        |
| 136 | BD | ( N - C ) | -> | 1275 | RY* | ( Ag )    | 118.61                                        |
| 138 | BD | ( N - C ) | -> | 1279 | RY* | ( Ag )    | 59.27                                         |
| 28  | BD | ( C - C ) | -> | 1275 | RY* | ( Ag )    | 144.27                                        |
| 34  | BD | ( C - C ) | -> | 440  | LP* | ( Ag )    | 64.94                                         |
| 50  | BD | ( C - C ) | -> | 440  | LP* | ( Ag )    | 115.07                                        |
| 50  | BD | ( C - C ) | -> | 1275 | RY* | ( Ag )    | 320.45                                        |
| 72  | BD | ( C - C ) | -> | 1276 | RY* | ( Ag )    | 51.11                                         |
| 151 | BD | ( C - C ) | -> | 1275 | RY* | ( Ag )    | 64.25                                         |
| 154 | BD | ( C - C ) | -> | 1275 | RY* | ( Ag )    | 216.24                                        |
| 154 | BD | ( C - C ) | -> | 1276 | RY* | ( Ag )    | 52.20                                         |
| 157 | BD | ( C - C ) | -> | 1275 | RY* | ( Ag )    | 54.47                                         |
| 165 | BD | ( C - C ) | -> | 1275 | RY* | ( Ag )    | 300.69                                        |
| 172 | BD | ( C - C ) | -> | 439  | LP* | ( Ag )    | 61.23                                         |
| 172 | BD | ( C - C ) | -> | 440  | LP* | ( Ag )    | 82.90                                         |
| 172 | BD | ( C - C ) | -> | 1274 | RY* | ( Ag )    | 91.68                                         |
| 172 | BD | ( C - C ) | -> | 1275 | RY* | ( Ag )    | 247.82                                        |
| 172 | BD | ( C - C ) | -> | 1276 | RY* | ( Ag )    | 101.12                                        |
| 173 | BD | ( C - C ) | -> | 1275 | RY* | ( Ag )    | 120.52                                        |
| 177 | BD | ( C - C ) | -> | 438  | LP* | ( Ag )    | 63.45                                         |
| 177 | BD | ( C - C ) | -> | 440  | LP* | ( Ag )    | 75.53                                         |
| 177 | BD | ( C - C ) | -> | 1275 | RY* | ( Ag )    | 115.52                                        |
| 178 | BD | ( C - C ) | -> | 439  | LP* | ( Ag )    | 54.96                                         |
| 178 | BD | ( C - C ) | -> | 440  | LP* | ( Ag )    | 74.31                                         |
| 178 | BD | ( C - C ) | -> | 1274 | RY* | ( Ag )    | 57.11                                         |
| 185 | BD | ( C - C ) | -> | 1275 | RY* | ( Ag )    | 116.60                                        |
| 186 | BD | ( C - C ) | -> | 439  | LP* | ( Ag )    | 71.05                                         |
| 186 | BD | ( C - C ) | -> | 440  | LP* | ( Ag )    | 81.45                                         |
| 186 | BD | ( C - C ) | -> | 1276 | RY* | ( Ag )    | 92.96                                         |
| 190 | BD | ( C - C ) | -> | 439  | LP* | ( Ag )    | 66.61                                         |
| 190 | BD | ( C - C ) | -> | 440  | LP* | ( Ag )    | 72.86                                         |
| 191 | BD | ( C - C ) | -> | 438  | LP* | ( Ag )    | 59.52                                         |
| 191 | BD | ( C - C ) | -> | 440  | LP* | ( Ag )    | 81.15                                         |
| 191 | BD | ( C - C ) | -> | 1275 | RY* | ( Ag )    | 413.77                                        |
| 94  | BD | ( C - H ) | -> | 440  | LP* | ( Ag )    | 51.51                                         |
| 94  | BD | ( C - H ) | -> | 1275 | RY* | ( Ag )    | 135.33                                        |
| 174 | BD | ( C - H ) | -> | 438  | LP* | ( Ag )    | 50.01                                         |
| 179 | BD | ( C - H ) | -> | 440  | LP* | ( Ag )    | 762.85                                        |
| 179 | BD | ( C - H ) | -> | 1274 | RY* | ( Ag )    | 89.45                                         |
| 187 | BD | ( C - H ) | -> | 438  | LP* | ( Ag )    | 50.32                                         |
| 189 | BD | ( C - H ) | -> | 440  | LP* | ( Ag )    | 69.08                                         |
| 192 | BD | ( C - H ) | -> | 440  | LP* | ( Ag )    | 327.47                                        |
| 199 | BD | ( C - H ) | -> | 439  | LP* | ( Ag )    | 70.35                                         |
| 199 | BD | ( C - H ) | -> | 440  | LP* | ( Ag )    | 665.84                                        |
| 199 | BD | ( C - H ) | -> | 1274 | RY* | ( Ag )    | 51.17                                         |
| 200 | BD | ( C - H ) | -> | 439  | LP* | ( Ag )    | 124.55                                        |
| 200 | BD | ( C - H ) | -> | 440  | LP* | ( Ag )    | 243.32                                        |
| 200 | BD | ( C - H ) | -> | 1274 | RY* | ( Ag )    | 86.05                                         |
| 200 | BD | ( C - H ) | -> | 1275 | RY* | ( Ag )    | 1321.85                                       |
| 201 | BD | ( C - H ) | -> | 439  | LP* | ( Ag )    | 82.96                                         |
| 201 | BD | ( C - H ) | -> | 440  | LP* | ( Ag )    | 344.47                                        |
| 205 | BD | ( C - H ) | -> | 438  | LP* | ( Ag )    | 74.22                                         |
| 205 | BD | ( C - H ) | -> | 440  | LP* | ( Ag )    | 145.72                                        |
| 206 | BD | ( C - H ) | -> | 440  | LP* | ( Ag )    | 73.41                                         |

|     |    |   |   |   |   |   |    |      |     |   |    |   |        |
|-----|----|---|---|---|---|---|----|------|-----|---|----|---|--------|
| 207 | BD | ( | C | - | H | ) | -> | 438  | LP* | ( | Ag | ) | 57.13  |
| 207 | BD | ( | C | - | H | ) | -> | 440  | LP* | ( | Ag | ) | 154.75 |
| 208 | BD | ( | C | - | H | ) | -> | 440  | LP* | ( | Ag | ) | 211.17 |
| 209 | BD | ( | C | - | H | ) | -> | 439  | LP* | ( | Ag | ) | 59.85  |
| 209 | BD | ( | C | - | H | ) | -> | 440  | LP* | ( | Ag | ) | 135.76 |
| 210 | BD | ( | C | - | H | ) | -> | 439  | LP* | ( | Ag | ) | 51.37  |
| 210 | BD | ( | C | - | H | ) | -> | 440  | LP* | ( | Ag | ) | 173.22 |
| 218 | BD | ( | C | - | H | ) | -> | 439  | LP* | ( | Ag | ) | 87.38  |
| 218 | BD | ( | C | - | H | ) | -> | 440  | LP* | ( | Ag | ) | 315.74 |
| 219 | BD | ( | C | - | H | ) | -> | 439  | LP* | ( | Ag | ) | 144.68 |
| 219 | BD | ( | C | - | H | ) | -> | 440  | LP* | ( | Ag | ) | 243.78 |
| 219 | BD | ( | C | - | H | ) | -> | 1274 | RY* | ( | Ag | ) | 57.51  |
| 220 | BD | ( | C | - | H | ) | -> | 439  | LP* | ( | Ag | ) | 74.15  |
| 220 | BD | ( | C | - | H | ) | -> | 440  | LP* | ( | Ag | ) | 629.71 |
| 221 | BD | ( | C | - | H | ) | -> | 440  | LP* | ( | Ag | ) | 212.53 |
| 222 | BD | ( | C | - | H | ) | -> | 439  | LP* | ( | Ag | ) | 63.63  |
| 222 | BD | ( | C | - | H | ) | -> | 440  | LP* | ( | Ag | ) | 170.00 |
| 224 | BD | ( | C | - | H | ) | -> | 438  | LP* | ( | Ag | ) | 81.58  |
| 224 | BD | ( | C | - | H | ) | -> | 440  | LP* | ( | Ag | ) | 124.06 |
| 225 | BD | ( | C | - | H | ) | -> | 438  | LP* | ( | Ag | ) | 50.78  |
| 225 | BD | ( | C | - | H | ) | -> | 440  | LP* | ( | Ag | ) | 197.43 |
| 226 | BD | ( | C | - | H | ) | -> | 440  | LP* | ( | Ag | ) | 83.67  |

Table S5. Occupancy and composition of Ag NBOs.

|      |     |   |    |   | occ.    | s%    | p%     | d%     |
|------|-----|---|----|---|---------|-------|--------|--------|
| 301  | CR  | ( | Ag | ) | 1.99822 | 0.00  | 100.00 | 0.00   |
| 303  | CR  | ( | Ag | ) | 1.99913 | 0.00  | 100.00 | 0.00   |
| 432  | LP  | ( | Ag | ) | 1.99601 | 0.00  | 0.00   | 100.00 |
| 434  | LP  | ( | Ag | ) | 1.99323 | 0.05  | 0.04   | 99.92  |
| 436  | LP  | ( | Ag | ) | 1.99039 | 0.00  | 0.01   | 99.99  |
| 437  | LP* | ( | Ag | ) | 0.11626 | 64.99 | 34.99  | 0.02   |
| 438  | LP* | ( | Ag | ) | 0.09007 | 32.91 | 66.90  | 0.18   |
| 439  | LP* | ( | Ag | ) | 0.07325 | 0.00  | 99.97  | 0.03   |
| 440  | LP* | ( | Ag | ) | 0.05996 | 1.98  | 98.00  | 0.03   |
| 1274 | RY* | ( | Ag | ) | 0.00118 | 0.49  | 25.08  | 74.43  |
| 1275 | RY* | ( | Ag | ) | 0.00096 | 2.56  | 75.86  | 21.58  |
| 1276 | RY* | ( | Ag | ) | 0.00069 | 4.60  | 30.98  | 64.42  |
| 1278 | RY* | ( | Ag | ) | 0.00041 | 60.42 | 7.19   | 32.39  |
| 1279 | RY* | ( | Ag | ) | 0.00032 | 22.35 | 27.35  | 50.30  |
| 1280 | RY* | ( | Ag | ) | 0.00010 | 0.02  | 0.78   | 99.20  |

**Table S6** Topological properties computed at the atomic (A), bond (B), ring (R) and cage critical points (C), viz. total electron density ( $\rho_{\text{tot}}$ ), Lagrangian kinetic energy (G), Hamiltonian kinetic energy (K), potential energy (V), energy density (H), Laplacian of the total electron density ( $\Delta\rho_{\text{tot}}$ ), Source Function (SF), total Electrostatic Potential (EPS<sub>tot</sub>), ellipticity of electron density ( $\epsilon$ ) and eta index ( $\eta$ ).

| #  | type | $\rho_{\text{tot}}(r)$ | G(r)      | K(r)       | V(r)       | H(r)       | $\Delta\rho_{\text{tot}}(r)$ | SF(r)      | ESP <sub>tot</sub> (r) | $\epsilon(r)$ | $\eta(r)$ |
|----|------|------------------------|-----------|------------|------------|------------|------------------------------|------------|------------------------|---------------|-----------|
| 1  | A    | 3.716E-01              | 5.269E-03 | 1.956E-01  | -1.961E+10 | -1.956E+00 | -7.804E+00                   | 3.754E-02  | 1.108E+01              | 0.002584      | -1.229003 |
| 2  | A    | 3.726E-01              | 5.547E-03 | 1.960E-01  | -1.966E+10 | -1.960E+00 | -7.819E+00                   | 3.906E-02  | 1.106E+01              | 0.002628      | -1.229392 |
| 3  | A    | 3.700E-01              | 5.816E-03 | 1.954E-01  | -1.960E+10 | -1.954E+00 | -7.792E+00                   | 3.684E-02  | 1.157E+01              | 0.000521      | -1.212999 |
| 4  | A    | 1.181E+02              | 5.186E+00 | 1.092E-01  | -1.092E+65 | -1.092E+05 | -4.368E+05                   | 2.274E+03  | 1.725E+07              | 0.000006      | -1.000008 |
| 5  | A    | 1.181E+02              | 5.207E+00 | 1.092E-01  | -1.092E+65 | -1.092E+05 | -4.369E+05                   | 2.330E+03  | 1.600E+07              | 0.000006      | -1.000007 |
| 6  | A    | 3.716E-01              | 5.269E-03 | 1.956E-01  | -1.961E+10 | -1.956E+00 | -7.804E+00                   | 3.753E-02  | 1.108E+01              | 0.002584      | -1.228999 |
| 7  | A    | 3.693E-01              | 5.704E-03 | 1.950E-01  | -1.956E+10 | -1.950E+00 | -7.777E+00                   | 3.452E-02  | 1.160E+01              | 0.000616      | -1.212322 |
| 8  | A    | 1.181E+02              | 5.220E+00 | 1.092E-01  | -1.092E+65 | -1.092E+05 | -4.366E+05                   | 2.109E+03  | 2.061E+07              | 0.000001      | -1.000001 |
| 9  | A    | 3.718E-01              | 5.463E-03 | 1.952E-01  | -1.958E+10 | -1.952E+00 | -7.788E+00                   | 4.104E-02  | 1.088E+01              | 0.002529      | -1.233744 |
| 10 | A    | 3.718E-01              | 5.462E-03 | 1.952E-01  | -1.958E+10 | -1.952E+00 | -7.788E+00                   | 4.103E-02  | 1.088E+01              | 0.002529      | -1.233744 |
| 11 | A    | 1.182E+02              | 5.208E+00 | 1.092E-01  | -1.092E+65 | -1.092E+05 | -4.369E+05                   | 2.411E+03  | 1.143E+07              | 0.000007      | -1.000007 |
| 12 | A    | 3.692E-01              | 5.689E-03 | 1.949E-01  | -1.954E+10 | -1.949E+00 | -7.772E+00                   | 3.651E-02  | 1.155E+01              | 0.000582      | -1.213512 |
| 13 | A    | 3.683E-01              | 5.674E-03 | 1.944E-01  | -1.950E+10 | -1.944E+00 | -7.755E+00                   | 5.085E-02  | 1.143E+01              | 0.000861      | -1.215215 |
| 14 | A    | 1.181E+02              | 5.186E+00 | 1.092E-01  | -1.092E+65 | -1.092E+05 | -4.368E+05                   | 2.273E+03  | 1.726E+07              | 0.000006      | -1.000008 |
| 15 | A    | 3.709E-01              | 5.174E-03 | 1.947E-01  | -1.953E+10 | -1.947E+00 | -7.769E+00                   | 2.776E-02  | 1.091E+01              | 0.002608      | -1.234633 |
| 16 | A    | 1.181E+02              | 5.191E+00 | 1.092E-01  | -1.092E+65 | -1.092E+05 | -4.369E+05                   | 2.537E+03  | 8.452E+06              | 0.000005      | -1.000007 |
| 17 | A    | 3.660E-01              | 5.319E-03 | 1.905E-01  | -1.911E+10 | -1.905E+00 | -7.600E+00                   | 3.387E-02  | 1.023E+01              | 0.002080      | -1.252835 |
| 18 | A    | 1.182E+02              | 5.208E+00 | 1.092E-01  | -1.092E+65 | -1.092E+05 | -4.369E+05                   | 2.410E+03  | 1.143E+07              | 0.000007      | -1.000007 |
| 19 | A    | 3.711E-01              | 5.881E-03 | 1.968E-01  | -1.974E+10 | -1.968E+00 | -7.848E+00                   | 4.305E-02  | 1.194E+01              | 0.000760      | -1.205035 |
| 20 | A    | 1.180E+02              | 5.159E+00 | 1.091E-01  | -1.091E+65 | -1.091E+05 | -4.364E+05                   | 2.508E+03  | 4.108E+06              | 0.000002      | -1.000003 |
| 21 | A    | 3.726E-01              | 5.547E-03 | 1.960E-01  | -1.966E+10 | -1.960E+00 | -7.819E+00                   | 3.905E-02  | 1.106E+01              | 0.002629      | -1.229403 |
| 22 | A    | 2.961E+02              | 6.799E+01 | 6.174E-01  | -6.175E+65 | -6.174E+05 | -2.469E+06                   | 2.402E+04  | 1.556E+06              | 0.000010      | -1.000010 |
| 23 | A    | 1.181E+02              | 5.240E+00 | 1.092E-01  | -1.092E+65 | -1.092E+05 | -4.368E+05                   | 2.940E+03  | 2.967E+06              | 0.000003      | -1.000005 |
| 24 | A    | 2.961E+02              | 6.799E+01 | 6.174E-01  | -6.175E+65 | -6.174E+05 | -2.469E+06                   | 2.402E+04  | 1.556E+06              | 0.000010      | -1.000010 |
| 25 | A    | 1.181E+02              | 5.207E+00 | 1.092E-01  | -1.092E+65 | -1.092E+05 | -4.369E+05                   | 2.330E+03  | 1.600E+07              | 0.000006      | -1.000007 |
| 26 | A    | 1.181E+02              | 5.164E+00 | 1.092E-01  | -1.092E+65 | -1.092E+05 | -4.367E+05                   | 1.659E+03  | 1.138E+07              | 0.000008      | -1.000008 |
| 27 | A    | 1.182E+02              | 5.180E+00 | 1.092E-01  | -1.092E+65 | -1.092E+05 | -4.369E+05                   | 2.648E+03  | 5.160E+06              | 0.000006      | -1.000009 |
| 28 | A    | 3.660E-01              | 5.628E-03 | 1.918E-01  | -1.924E+10 | -1.918E+00 | -7.650E+00                   | 5.384E-02  | 1.076E+01              | 0.000686      | -1.230327 |
| 29 | A    | 3.690E-01              | 5.663E-03 | 1.951E-01  | -1.956E+10 | -1.951E+00 | -7.780E+00                   | 4.995E-02  | 1.158E+01              | 0.000886      | -1.212347 |
| 30 | A    | 1.182E+02              | 5.190E+00 | 1.092E-01  | -1.092E+65 | -1.092E+05 | -4.369E+05                   | 1.897E+03  | 4.148E+06              | 0.000008      | -1.000010 |
| 31 | A    | 1.181E+02              | 5.183E+00 | 1.092E-01  | -1.092E+65 | -1.092E+05 | -4.368E+05                   | 2.710E+03  | 1.234E+06              | 0.000005      | -1.000009 |
| 32 | A    | 3.711E-01              | 5.881E-03 | 1.968E-01  | -1.974E+10 | -1.968E+00 | -7.848E+00                   | 4.305E-02  | 1.194E+01              | 0.000760      | -1.205034 |
| 33 | A    | 1.181E+02              | 5.246E+00 | 1.092E-01  | -1.092E+65 | -1.092E+05 | -4.367E+05                   | 2.728E+03  | 4.037E+06              | 0.000002      | -1.000004 |
| 34 | A    | 3.781E-01              | 6.172E-03 | 1.997E-01  | -2.003E+10 | -1.997E+00 | -7.962E+00                   | 4.541E-02  | 1.154E+01              | 0.000400      | -1.216387 |
| 35 | A    | 3.642E-01              | 5.612E-03 | 1.905E-01  | -1.911E+10 | -1.905E+00 | -7.599E+00                   | 6.077E-02  | 1.054E+01              | 0.000652      | -1.236361 |
| 36 | A    | 3.691E-01              | 5.746E-03 | 1.952E-01  | -1.958E+10 | -1.952E+00 | -7.786E+00                   | 3.668E-02  | 1.171E+01              | 0.000583      | -1.210026 |
| 37 | A    | 3.691E-01              | 5.745E-03 | 1.952E-01  | -1.958E+10 | -1.952E+00 | -7.786E+00                   | 3.668E-02  | 1.171E+01              | 0.000583      | -1.210026 |
| 38 | A    | 3.701E-01              | 5.297E-03 | 1.946E-01  | -1.951E+10 | -1.946E+00 | -7.763E+00                   | 2.576E-02  | 1.102E+01              | 0.002351      | -1.231681 |
| 39 | A    | 1.182E+02              | 5.180E+00 | 1.092E-01  | -1.092E+65 | -1.092E+05 | -4.369E+05                   | 2.648E+03  | 5.160E+06              | 0.000006      | -1.000009 |
| 40 | A    | 3.679E-01              | 5.642E-03 | 1.937E-01  | -1.943E+10 | -1.937E+00 | -7.726E+00                   | 4.801E-02  | 1.123E+01              | 0.000791      | -1.219407 |
| 41 | A    | 3.659E-01              | 5.628E-03 | 1.918E-01  | -1.924E+10 | -1.918E+00 | -7.650E+00                   | 5.384E-02  | 1.076E+01              | 0.000686      | -1.230341 |
| 42 | A    | 1.181E+02              | 5.174E+00 | 1.092E-01  | -1.092E+65 | -1.092E+05 | -4.368E+05                   | 1.579E+03  | 1.177E+07              | 0.000007      | -1.000008 |
| 43 | A    | 1.181E+02              | 5.246E+00 | 1.092E-01  | -1.092E+65 | -1.092E+05 | -4.367E+05                   | 2.728E+03  | 4.036E+06              | 0.000002      | -1.000004 |
| 44 | A    | 3.700E-01              | 5.816E-03 | 1.954E-01  | -1.960E+10 | -1.954E+00 | -7.792E+00                   | 3.684E-02  | 1.157E+01              | 0.000521      | -1.213009 |
| 45 | A    | 1.180E+02              | 5.193E+00 | 1.091E-01  | -1.091E+65 | -1.091E+05 | -4.365E+05                   | 2.705E+03  | 2.257E+06              | 0.000002      | -1.000006 |
| 46 | A    | 2.959E+02              | 6.856E+01 | 6.171E-01  | -6.172E+65 | -6.171E+05 | -2.468E+06                   | 2.660E+04  | 1.713E+06              | 0.000007      | -1.000011 |
| 47 | A    | 1.180E+02              | 5.193E+00 | 1.091E-01  | -1.091E+65 | -1.091E+05 | -4.365E+05                   | 2.705E+03  | 2.258E+06              | 0.000002      | -1.000006 |
| 48 | A    | 1.181E+02              | 5.191E+00 | 1.092E-01  | -1.092E+65 | -1.092E+05 | -4.369E+05                   | 2.536E+03  | 8.447E+06              | 0.000005      | -1.000007 |
| 49 | C    | 2.314E-05              | 2.352E-01 | -2.045E-01 | -2.148E+00 | 2.045E-02  | 1.023E+00                    | -1.477E-02 | 2.194E+04              | -0.013707     | 0.972549  |
| 50 | C    | 2.314E-05              | 2.352E-01 | -2.045E-01 | -2.148E+00 | 2.045E-02  | 1.023E+00                    | -1.477E-02 | 2.193E+04              | -0.013692     | 0.972549  |
| 51 | A    | 1.182E+02              | 5.263E+00 | 1.092E-01  | -1.092E+65 | -1.092E+05 | -4.370E+05                   | 2.082E+03  | 6.488E+06              | 0.000006      | -1.000008 |
| 52 | A    | 2.955E+02              | 6.962E+01 | 6.163E-01  | -6.164E+65 | -6.163E+05 | -2.465E+06                   | 2.888E+04  | 1.823E+06              | 0.000010      | -1.000015 |
| 53 | A    | 1.181E+02              | 5.209E+00 | 1.092E-01  | -1.092E+65 | -1.092E+05 | -4.368E+05                   | 2.262E+03  | 1.679E+07              | 0.000001      | -1.000002 |
| 54 | A    | 2.955E+02              | 6.987E+01 | 6.162E-01  | -6.162E+65 | -6.162E+05 | -2.464E+06                   | 4.544E+04  | 2.016E+06              | 0.000004      | -1.000013 |
| 55 | A    | 1.181E+02              | 5.209E+00 | 1.092E-01  | -1.092E+65 | -1.092E+05 | -4.368E+05                   | 2.262E+03  | 1.677E+07              | 0.000001      | -1.000002 |
| 56 | A    | 1.943E+02              | 2.574E+01 | 3.034E-01  | -3.035E+65 | -3.034E+05 | -1.214E+06                   | 7.968E+03  | 7.270E+05              | 0.000006      | -1.000032 |
| 57 | A    | 3.660E-01              | 5.319E-03 | 1.905E-01  | -1.911E+10 | -1.905E+00 | -7.600E+00                   | 3.386E-02  | 1.023E+01              | 0.002080      | -1.252837 |
| 58 | A    | 3.713E-01              | 5.843E-03 | 1.962E-01  | -1.968E+10 | -1.962E+00 | -7.826E+00                   | 3.926E-02  | 1.159E+01              | 0.000464      | -1.212212 |
| 59 | A    | 3.683E-01              | 5.674E-03 | 1.944E-01  | -1.950E+10 | -1.944E+00 | -7.754E+00                   | 5.086E-02  | 1.143E+01              | 0.000862      | -1.215240 |
| 60 | A    | 1.181E+02              | 5.183E+00 | 1.092E-01  | -1.092E+65 | -1.092E+05 | -4.368E+05                   | 2.710E+03  | 1.235E+06              | 0.000005      | -1.000009 |
| 61 | A    | 3.693E-01              | 5.704E-03 | 1.950E-01  | -1.956E+10 | -1.950E+00 | -7.777E+00                   | 3.451E-02  | 1.160E+01              | 0.000616      | -1.212321 |
| 62 | A    | 2.959E+02              | 6.856E+01 | 6.171E-01  | -6.172E+65 | -6.171E+05 | -2.468E+06                   | 2.660E+04  | 1.713E+06              | 0.000007      | -1.000011 |
| 63 | A    | 3.709E-01              | 5.174E-03 | 1.947E-01  | -1.953E+10 | -1.947E+00 | -7.769E+00                   | 2.775E-02  | 1.091E+01              | 0.002608      | -1.234632 |
| 64 | A    | 3.679E-01              | 5.642E-03 | 1.937E-01  | -1.943E+10 | -1.937E+00 | -7.726E+00                   | 4.800E-02  | 1.123E+01              | 0.000791      | -1.219397 |
| 65 | A    | 3.683E-01              | 5.657E-03 | 1.942E-01  | -1.948E+10 | -1.942E+00 | -7.746E+00                   | 3.962E-02  | 1.144E+01              | 0.000591      | -1.215553 |
| 66 | A    | 1.181E+02              | 5.220E+00 | 1.092E-01  | -1.092E+65 | -1.092E+05 | -4.366E+05                   | 2.108E+03  | 2.055E+07              | 0.000001      | -1.000001 |
| 67 | A    | 1.182E+02              | 5.161E+00 | 1.093E-01  | -1.093E+65 | -1.093E+05 | -4.371E+05                   | 2.493E+03  | 1.065E+07              | 0.000007      | -1.000009 |
| 68 | A    | 3.691E-01              | 6.393E-03 | 1.930E-01  | -1.936E+10 | -1.930E+00 | -7.694E+00                   | 5.376E-02  | 1.061E+01              | 0.000274      | -1.237793 |
| 69 | A    | 3.691E-01              | 6.392E-03 | 1.930E-01  | -1.936E+10 | -1.930E+00 | -7.694E+00                   | 5.376E-02  | 1.061E+01              | 0.000275      | -1.237788 |
| 70 | A    | 2.955E+02              | 6.987E+01 | 6.162E-01  | -6.162E+65 | -6.162E+05 | -2.464E+06                   | 4.544E+04  | 2.016E+06              | 0.000004      | -1.000013 |
| 71 | A    | 3.713E-01              | 5.843E-03 | 1.962E-01  | -1.968E+10 | -1.962E+00 | -7.826E+00                   | 3.926E-02  | 1.159E+01              | 0.000464      | -1.212208 |

|     |   |           |           |            |            |            |            |            |           |           |           |
|-----|---|-----------|-----------|------------|------------|------------|------------|------------|-----------|-----------|-----------|
| 72  | A | 1.181E+02 | 5.242E+00 | 1.092E-01  | -1.092E+65 | -1.092E+05 | -4.366E+05 | 1.679E+03  | 1.379E+08 | 0.000008  | -1.000008 |
| 73  | A | 1.180E+02 | 5.159E+00 | 1.091E-01  | -1.091E+65 | -1.091E+05 | -4.364E+05 | 2.507E+03  | 4.111E+06 | 0.000002  | -1.000003 |
| 74  | A | 3.683E-01 | 5.657E-03 | 1.942E-01  | -1.948E+10 | -1.942E+00 | -7.746E+00 | 3.962E-02  | 1.144E+01 | 0.000591  | -1.215539 |
| 75  | A | 2.955E-02 | 6.962E+01 | 6.163E-01  | -6.164E+65 | -6.163E+05 | -2.465E+06 | 2.888E+04  | 1.823E+06 | 0.000010  | -1.000015 |
| 76  | A | 1.182E+02 | 5.280E+00 | 1.093E-01  | -1.093E+65 | -1.093E+05 | -4.370E+05 | 1.929E+03  | 3.124E+07 | 0.000010  | -1.000010 |
| 77  | A | 1.181E+02 | 5.240E+00 | 1.092E-01  | -1.092E+65 | -1.092E+05 | -4.368E+05 | 2.939E+03  | 2.968E+06 | 0.000003  | -1.000005 |
| 78  | A | 1.182E+02 | 5.190E+00 | 1.092E-01  | -1.092E+65 | -1.092E+05 | -4.369E+05 | 1.897E+03  | 4.148E+06 | 0.000008  | -1.000010 |
| 79  | A | 2.960E+02 | 6.806E+01 | 6.173E-01  | -6.174E+65 | -6.173E+05 | -2.469E+06 | 1.964E+04  | 1.544E+06 | 0.000002  | -1.000006 |
| 80  | A | 1.181E+02 | 5.164E+00 | 1.092E-01  | -1.092E+65 | -1.092E+05 | -4.367E+05 | 1.659E+03  | 1.138E+07 | 0.000008  | -1.000008 |
| 81  | A | 3.692E-01 | 5.689E-03 | 1.949E-01  | -1.954E+10 | -1.949E+00 | -7.772E+00 | 3.650E-02  | 1.155E+01 | 0.000582  | -1.213516 |
| 82  | A | 3.642E-01 | 5.613E-03 | 1.906E-01  | -1.911E+10 | -1.906E+00 | -7.600E+00 | 6.075E-02  | 1.054E+01 | 0.000652  | -1.236334 |
| 83  | A | 2.959E+02 | 6.841E+01 | 6.172E-01  | -6.172E+65 | -6.172E+05 | -2.468E+06 | 3.161E+04  | 1.766E+06 | 0.000005  | -1.000008 |
| 84  | A | 2.958E+02 | 6.888E+01 | 6.169E-01  | -6.170E+65 | -6.169E+05 | -2.467E+06 | 3.462E+04  | 2.082E+06 | 0.000007  | -1.000010 |
| 85  | A | 1.943E+02 | 2.574E+01 | 3.034E-01  | -3.035E+65 | -3.034E+05 | -1.214E+06 | 7.967E+03  | 7.269E+05 | 0.000006  | -1.000032 |
| 86  | C | 2.569E-05 | 2.365E-01 | -2.183E-01 | -2.146E+00 | 2.183E-02  | 1.033E+00  | -1.160E-02 | 2.064E+04 | -0.013878 | 0.974967  |
| 87  | C | 2.210E-05 | 2.325E-01 | -2.011E-01 | -2.124E+00 | 2.011E-02  | 1.011E+00  | -2.392E-02 | 5.032E+04 | -0.001977 | 0.974640  |
| 88  | C | 1.592E-04 | 7.518E-01 | -1.461E-01 | -6.056E-01 | 1.461E-01  | 3.592E+00  | -3.580E-02 | 1.284E+05 | -0.012590 | 0.986042  |
| 89  | A | 3.781E-01 | 6.171E-03 | 1.997E-01  | -2.003E+10 | -1.997E+00 | -7.962E+00 | 4.538E-02  | 1.154E+01 | 0.000400  | -1.216363 |
| 90  | A | 3.701E-01 | 5.297E-03 | 1.946E-01  | -1.951E+10 | -1.946E+00 | -7.763E+00 | 2.576E-02  | 1.102E+01 | 0.002351  | -1.231681 |
| 91  | A | 3.690E-01 | 5.663E-03 | 1.951E-01  | -1.956E+10 | -1.951E+00 | -7.780E+00 | 4.994E-02  | 1.158E+01 | 0.000887  | -1.212348 |
| 92  | A | 1.181E+02 | 5.174E+00 | 1.092E-01  | -1.092E+65 | -1.092E+05 | -4.368E+05 | 1.579E+03  | 1.177E+07 | 0.000007  | -1.000008 |
| 93  | A | 2.959E+02 | 6.863E+01 | 6.170E-01  | -6.171E+65 | -6.170E+05 | -2.468E+06 | 2.277E+04  | 1.773E+06 | 0.000006  | -1.000008 |
| 94  | A | 1.182E+02 | 5.160E+00 | 1.093E-01  | -1.093E+65 | -1.093E+05 | -4.371E+05 | 2.493E+03  | 1.064E+07 | 0.000007  | -1.000009 |
| 95  | A | 1.182E+02 | 5.263E+00 | 1.092E-01  | -1.092E+65 | -1.092E+05 | -4.370E+05 | 2.082E+03  | 6.487E+06 | 0.000006  | -1.000008 |
| 96  | A | 2.953E+02 | 7.003E+01 | 6.159E-01  | -6.160E+65 | -6.159E+05 | -2.463E+06 | 7.609E+04  | 4.897E+06 | 0.000003  | -1.000008 |
| 97  | A | 2.953E+02 | 7.003E+01 | 6.159E-01  | -6.160E+65 | -6.159E+05 | -2.463E+06 | 7.608E+04  | 4.898E+06 | 0.000003  | -1.000008 |
| 98  | A | 1.182E+02 | 5.263E+00 | 1.092E-01  | -1.092E+65 | -1.092E+05 | -4.370E+05 | 2.082E+03  | 6.487E+06 | 0.000006  | -1.000008 |
| 99  | A | 1.182E+02 | 5.160E+00 | 1.093E-01  | -1.093E+65 | -1.093E+05 | -4.371E+05 | 2.493E+03  | 1.065E+07 | 0.000007  | -1.000009 |
| 100 | A | 2.959E+02 | 6.863E+01 | 6.170E-01  | -6.171E+65 | -6.170E+05 | -2.468E+06 | 2.277E+04  | 1.773E+06 | 0.000006  | -1.000008 |
| 101 | A | 1.181E+02 | 5.174E+00 | 1.092E-01  | -1.092E+65 | -1.092E+05 | -4.368E+05 | 1.579E+03  | 1.177E+07 | 0.000007  | -1.000008 |
| 102 | A | 3.690E-01 | 5.663E-03 | 1.951E-01  | -1.956E+10 | -1.951E+00 | -7.780E+00 | 4.994E-02  | 1.158E+01 | 0.000887  | -1.212347 |
| 103 | A | 3.701E-01 | 5.297E-03 | 1.946E-01  | -1.951E+10 | -1.946E+00 | -7.763E+00 | 2.576E-02  | 1.102E+01 | 0.002351  | -1.231680 |
| 104 | A | 3.781E-01 | 6.171E-03 | 1.997E-01  | -2.003E+10 | -1.997E+00 | -7.962E+00 | 4.538E-02  | 1.154E+01 | 0.000400  | -1.216357 |
| 105 | C | 1.591E-04 | 7.518E-01 | -1.461E-01 | -6.056E-01 | 1.461E-01  | 3.592E+00  | -3.580E-02 | 1.285E+05 | -0.012591 | 0.986050  |
| 106 | C | 2.210E-05 | 2.325E-01 | -2.012E-01 | -2.124E+00 | 2.012E-02  | 1.011E+00  | -2.392E-02 | 5.030E+04 | -0.001981 | 0.974634  |
| 107 | C | 2.569E-05 | 2.365E-01 | -2.183E-01 | -2.146E+00 | 2.183E-02  | 1.033E+00  | -1.160E-02 | 2.064E+04 | -0.013874 | 0.974972  |
| 108 | A | 1.943E+02 | 2.574E+01 | 3.034E-01  | -3.035E+65 | -3.034E+05 | -1.214E+06 | 7.967E+03  | 7.270E+05 | 0.000006  | -1.000032 |
| 109 | A | 2.958E+02 | 6.888E+01 | 6.169E-01  | -6.170E+65 | -6.169E+05 | -2.467E+06 | 3.462E+04  | 2.082E+06 | 0.000007  | -1.000010 |
| 110 | A | 2.959E+02 | 6.841E+01 | 6.172E-01  | -6.172E+65 | -6.172E+05 | -2.468E+06 | 3.161E+04  | 1.766E+06 | 0.000005  | -1.000008 |
| 111 | A | 3.642E-01 | 5.613E-03 | 1.906E-01  | -1.911E+10 | -1.906E+00 | -7.600E+00 | 6.075E-02  | 1.054E+01 | 0.000652  | -1.236339 |
| 112 | A | 3.692E-01 | 5.689E-03 | 1.949E-01  | -1.954E+10 | -1.949E+00 | -7.772E+00 | 3.650E-02  | 1.155E+01 | 0.000582  | -1.213515 |
| 113 | A | 1.181E+02 | 5.164E+00 | 1.092E-01  | -1.092E+65 | -1.092E+05 | -4.367E+05 | 1.659E+03  | 1.137E+07 | 0.000008  | -1.000008 |
| 114 | A | 2.960E+02 | 6.806E+01 | 6.173E-01  | -6.174E+65 | -6.173E+05 | -2.469E+06 | 1.964E+04  | 1.544E+06 | 0.000002  | -1.000006 |
| 115 | A | 1.182E+02 | 5.190E+00 | 1.092E-01  | -1.092E+65 | -1.092E+05 | -4.369E+05 | 1.897E+03  | 4.148E+06 | 0.000008  | -1.000010 |
| 116 | A | 1.181E+02 | 5.240E+00 | 1.092E-01  | -1.092E+65 | -1.092E+05 | -4.368E+05 | 2.939E+03  | 2.968E+06 | 0.000003  | -1.000005 |
| 117 | A | 1.182E+02 | 5.280E+00 | 1.093E-01  | -1.093E+65 | -1.093E+05 | -4.370E+05 | 1.929E+03  | 3.122E+07 | 0.000010  | -1.000010 |
| 118 | A | 2.955E+02 | 6.962E+01 | 6.163E-01  | -6.164E+65 | -6.163E+05 | -2.465E+06 | 2.888E+04  | 1.822E+06 | 0.000010  | -1.000015 |
| 119 | A | 3.683E-01 | 5.657E-03 | 1.942E-01  | -1.948E+10 | -1.942E+00 | -7.746E+00 | 3.962E-02  | 1.144E+01 | 0.000591  | -1.215542 |
| 120 | A | 1.180E+02 | 5.159E+00 | 1.091E-01  | -1.091E+65 | -1.091E+05 | -4.364E+05 | 2.507E+03  | 4.111E+06 | 0.000002  | -1.000003 |
| 121 | A | 1.181E+02 | 5.242E+00 | 1.092E-01  | -1.092E+65 | -1.092E+05 | -4.366E+05 | 1.679E+03  | 1.380E+08 | 0.000008  | -1.000008 |
| 122 | A | 3.713E-01 | 5.843E-03 | 1.962E-01  | -1.968E+10 | -1.962E+00 | -7.826E+00 | 3.926E-02  | 1.159E+01 | 0.000464  | -1.212210 |
| 123 | A | 2.955E+02 | 6.987E+01 | 6.162E-01  | -6.162E+65 | -6.162E+05 | -2.464E+06 | 4.544E+04  | 2.016E+06 | 0.000004  | -1.000013 |
| 124 | A | 3.691E-01 | 6.392E-03 | 1.930E-01  | -1.936E+10 | -1.930E+00 | -7.694E+00 | 5.376E-02  | 1.061E+01 | 0.000274  | -1.237786 |
| 125 | A | 3.691E-01 | 6.393E-03 | 1.930E-01  | -1.936E+10 | -1.930E+00 | -7.694E+00 | 5.376E-02  | 1.061E+01 | 0.000274  | -1.237800 |
| 126 | A | 1.182E+02 | 5.161E+00 | 1.093E-01  | -1.093E+65 | -1.093E+05 | -4.371E+05 | 2.493E+03  | 1.065E+07 | 0.000007  | -1.000009 |
| 127 | A | 1.181E+02 | 5.220E+00 | 1.092E-01  | -1.092E+65 | -1.092E+05 | -4.366E+05 | 2.108E+03  | 2.056E+07 | 0.000001  | -1.000001 |
| 128 | A | 3.683E-01 | 5.657E-03 | 1.942E-01  | -1.948E+10 | -1.942E+00 | -7.746E+00 | 3.962E-02  | 1.144E+01 | 0.000591  | -1.215547 |
| 129 | A | 3.679E-01 | 5.642E-03 | 1.937E-01  | -1.943E+10 | -1.937E+00 | -7.726E+00 | 4.800E-02  | 1.123E+01 | 0.000791  | -1.219400 |
| 130 | A | 3.709E-01 | 5.174E-03 | 1.947E-01  | -1.953E+10 | -1.947E+00 | -7.769E+00 | 2.775E-02  | 1.091E+01 | 0.002608  | -1.234633 |
| 131 | A | 2.959E+02 | 6.856E+01 | 6.171E-01  | -6.172E+65 | -6.171E+05 | -2.468E+06 | 2.660E+04  | 1.713E+06 | 0.000007  | -1.000011 |
| 132 | A | 3.693E-01 | 5.704E-03 | 1.950E-01  | -1.956E+10 | -1.950E+00 | -7.777E+00 | 3.451E-02  | 1.160E+01 | 0.000610  | -1.212319 |
| 133 | A | 1.181E+02 | 5.183E+00 | 1.092E-01  | -1.092E+65 | -1.092E+05 | -4.368E+05 | 2.710E+03  | 1.234E+06 | 0.000005  | -1.000009 |
| 134 | A | 3.683E-01 | 5.674E-03 | 1.944E-01  | -1.950E+10 | -1.944E+00 | -7.754E+00 | 5.086E-02  | 1.143E+01 | 0.000862  | -1.215239 |
| 135 | A | 3.713E-01 | 5.843E-03 | 1.962E-01  | -1.968E+10 | -1.962E+00 | -7.826E+00 | 3.926E-02  | 1.159E+01 | 0.000464  | -1.212211 |
| 136 | A | 3.660E-01 | 5.319E-03 | 1.905E-01  | -1.911E+10 | -1.905E+00 | -7.600E+00 | 3.386E-02  | 1.023E+01 | 0.002080  | -1.252836 |
| 137 | A | 1.943E+02 | 2.574E+01 | 3.034E-01  | -3.035E+65 | -3.034E+05 | -1.214E+06 | 7.967E+03  | 7.270E+05 | 0.000006  | -1.000032 |
| 138 | A | 1.181E+02 | 5.209E+00 | 1.092E-01  | -1.092E+65 | -1.092E+05 | -4.368E+05 | 2.262E+03  | 1.678E+07 | 0.000001  | -1.000002 |
| 139 | A | 2.955E+02 | 6.987E+01 | 6.162E-01  | -6.162E+65 | -6.162E+05 | -2.464E+06 | 4.544E+04  | 2.016E+06 | 0.000004  | -1.000013 |
| 140 | A | 1.181E+02 | 5.209E+00 | 1.092E-01  | -1.092E+65 | -1.092E+05 | -4.368E+05 | 2.262E+03  | 1.679E+07 | 0.000001  | -1.000002 |
| 141 | A | 2.955E+02 | 6.962E+01 | 6.163E-01  | -6.164E+65 | -6.163E+05 | -2.465E+06 | 2.888E+04  | 1.822E+06 | 0.000010  | -1.000015 |
| 142 | A | 1.182E+02 | 5.263E+00 | 1.092E-01  | -1.092E+65 | -1.092E+05 | -4.370E+05 | 2.082E+03  | 6.488E+06 | 0.000006  | -1.000008 |
| 143 | C | 2.314E-05 | 2.352E-01 | -2.045E-01 | -2.148E+00 | 2.045E-02  | 1.023E+00  | -1.477E-02 | 2.193E+04 | -0.013701 | 0.972545  |
| 144 | C | 2.314E-05 | 2.352E-01 | -2.045E-01 | -2.148E+00 | 2.045E-02  | 1.023E+00  | -1.477E-02 | 2.194E+04 | -0.013710 | 0.972556  |
| 145 | A | 1.181E+02 | 5.191E+00 | 1.092E-01  | -1.092E+65 | -1.092E+05 | -4.369E+05 | 2.536E+03  | 8.448E+06 | 0.000005  | -1.000007 |
| 146 | A | 1.180E+02 | 5.193E+00 | 1.091E-01  | -1.091E+65 | -1.091E+05 | -4.365E+05 | 2.705E+03  | 2.258E+06 | 0.000002  | -1.000006 |
| 147 | A | 2.959E+02 | 6.856E+01 | 6.171E-01  | -6.172E+65 | -6.171E+05 | -2.468E+06 | 2.660E+04  | 1.713E+06 | 0.000007  | -1.000011 |
| 148 | A | 1.180E+02 | 5.193E+00 | 1.091E-01  | -1.091E+65 | -1.091E+05 | -4.365E+05 | 2.705E+03  | 2.257E+06 | 0.000002  | -1.000006 |
| 149 | A | 3.700E-01 | 5.816E-03 | 1.954E-01  | -1.960E+10 | -1.954E+00 | -7.792E+00 | 3.684E-02  | 1.157E+01 | 0.000521  | -1.213009 |
| 150 | A | 1.181E+02 | 5.246E+00 | 1.092E-01  | -1.092E+65 | -1.092E+05 | -4.367E+05 | 2.728E+03  | 4.038E+06 | 0.000002  | -1.000004 |
| 151 | A | 1.181E+02 | 5.174E+00 | 1.092E-01  | -1.092E+65 | -1.092E+05 | -4.368E+05 | 1.579E+03  | 1.177E+07 | 0.000007  |           |



|     |   |           |           |            |            |            |            |            |            |           |           |
|-----|---|-----------|-----------|------------|------------|------------|------------|------------|------------|-----------|-----------|
| 157 | A | 3.691E-01 | 5.746E-03 | 1.952E-01  | -1.958E+10 | -1.952E+00 | -7.786E+00 | 3.668E-02  | 1.171E+01  | 0.000583  | -1.210028 |
| 158 | A | 3.642E-01 | 5.612E-03 | 1.905E-01  | -1.911E+10 | -1.905E+00 | -7.599E+00 | 6.076E-02  | 1.054E+01  | 0.000652  | -1.236357 |
| 159 | A | 3.781E-01 | 6.171E-03 | 1.997E-01  | -2.003E+10 | -1.997E+00 | -7.962E+00 | 4.540E-02  | 1.154E+01  | 0.000400  | -1.216386 |
| 160 | A | 1.181E+02 | 5.246E+00 | 1.092E-01  | -1.092E+65 | -1.092E+05 | -4.367E+05 | 2.728E+03  | 4.036E+06  | 0.000002  | -1.000004 |
| 161 | A | 3.711E-01 | 5.881E-03 | 1.968E-01  | -1.974E+10 | -1.968E+00 | -7.848E+00 | 4.305E-02  | 1.194E+01  | 0.000760  | -1.205035 |
| 162 | A | 1.181E+02 | 5.183E+00 | 1.092E-01  | -1.092E+65 | -1.092E+05 | -4.368E+05 | 2.710E+03  | 1.234E+06  | 0.000005  | -1.000009 |
| 163 | A | 1.182E+02 | 5.190E+00 | 1.092E-01  | -1.092E+65 | -1.092E+05 | -4.369E+05 | 1.897E+03  | 4.148E+06  | 0.000008  | -1.000010 |
| 164 | A | 3.690E-01 | 5.663E-03 | 1.951E-01  | -1.956E+10 | -1.951E+00 | -7.780E+00 | 4.994E-02  | 1.158E+01  | 0.000886  | -1.212348 |
| 165 | A | 3.660E-01 | 5.628E-03 | 1.918E-01  | -1.924E+10 | -1.918E+00 | -7.650E+00 | 5.384E-02  | 1.076E+01  | 0.000686  | -1.230332 |
| 166 | A | 1.182E+02 | 5.180E+00 | 1.092E-01  | -1.092E+65 | -1.092E+05 | -4.369E+05 | 2.648E+03  | 5.160E+06  | 0.000006  | -1.000009 |
| 167 | A | 1.181E+02 | 5.164E+00 | 1.092E-01  | -1.092E+65 | -1.092E+05 | -4.367E+05 | 1.659E+03  | 1.138E+07  | 0.000008  | -1.000008 |
| 168 | A | 1.181E+02 | 5.207E+00 | 1.092E-01  | -1.092E+65 | -1.092E+05 | -4.369E+05 | 2.330E+03  | 1.599E+07  | 0.000006  | -1.000007 |
| 169 | A | 2.961E+02 | 6.799E+01 | 6.174E-01  | -6.175E+65 | -6.174E+05 | -2.469E+06 | 2.402E+04  | 1.556E+06  | 0.000010  | -1.000010 |
| 170 | A | 1.181E+02 | 5.240E+00 | 1.092E-01  | -1.092E+65 | -1.092E+05 | -4.368E+05 | 2.940E+03  | 2.968E+06  | 0.000003  | -1.000005 |
| 171 | A | 2.961E+02 | 6.799E+01 | 6.174E-01  | -6.175E+65 | -6.174E+05 | -2.469E+06 | 2.402E+04  | 1.556E+06  | 0.000010  | -1.000010 |
| 172 | A | 3.726E-01 | 5.547E-03 | 1.960E-01  | -1.966E+10 | -1.960E+00 | -7.819E+00 | 3.905E-02  | 1.106E+01  | 0.002629  | -1.229404 |
| 173 | A | 1.180E+02 | 5.159E+00 | 1.091E-01  | -1.091E+65 | -1.091E+05 | -4.364E+05 | 2.508E+03  | 4.108E+06  | 0.000002  | -1.000003 |
| 174 | A | 3.711E-01 | 5.881E-03 | 1.968E-01  | -1.974E+10 | -1.968E+00 | -7.848E+00 | 4.305E-02  | 1.194E+01  | 0.000760  | -1.205040 |
| 175 | A | 1.182E+02 | 5.208E+00 | 1.092E-01  | -1.092E+65 | -1.092E+05 | -4.369E+05 | 2.410E+03  | 1.143E+07  | 0.000007  | -1.000007 |
| 176 | A | 3.660E-01 | 5.319E-03 | 1.905E-01  | -1.911E+10 | -1.905E+00 | -7.600E+00 | 3.386E-02  | 1.023E+01  | 0.002080  | -1.252835 |
| 177 | A | 1.181E+02 | 5.191E+00 | 1.092E-01  | -1.092E+65 | -1.092E+05 | -4.369E+05 | 2.537E+03  | 8.450E+06  | 0.000005  | -1.000007 |
| 178 | A | 3.709E-01 | 5.174E-03 | 1.947E-01  | -1.953E+10 | -1.947E+00 | -7.769E+00 | 2.775E-02  | 1.091E+01  | 0.002608  | -1.234633 |
| 179 | A | 1.181E+02 | 5.186E+00 | 1.092E-01  | -1.092E+65 | -1.092E+05 | -4.368E+05 | 2.273E+03  | 1.726E+07  | 0.000006  | -1.000008 |
| 180 | A | 3.683E-01 | 5.674E-03 | 1.944E-01  | -1.950E+10 | -1.944E+00 | -7.755E+00 | 5.085E-02  | 1.143E+01  | 0.000862  | -1.215217 |
| 181 | A | 3.692E-01 | 5.689E-03 | 1.949E-01  | -1.954E+10 | -1.949E+00 | -7.772E+00 | 3.651E-02  | 1.155E+01  | 0.000582  | -1.213513 |
| 182 | A | 1.182E+02 | 5.208E+00 | 1.092E-01  | -1.092E+65 | -1.092E+05 | -4.369E+05 | 2.411E+03  | 1.143E+07  | 0.000007  | -1.000007 |
| 183 | A | 3.718E-01 | 5.463E-03 | 1.952E-01  | -1.958E+10 | -1.952E+00 | -7.788E+00 | 4.103E-02  | 1.088E+01  | 0.002529  | -1.233743 |
| 184 | A | 3.718E-01 | 5.463E-03 | 1.952E-01  | -1.958E+10 | -1.952E+00 | -7.788E+00 | 4.103E-02  | 1.088E+01  | 0.002529  | -1.233745 |
| 185 | A | 1.181E+02 | 5.220E+00 | 1.092E-01  | -1.092E+65 | -1.092E+05 | -4.366E+05 | 2.108E+03  | 2.060E+07  | 0.000001  | -1.000001 |
| 186 | A | 3.693E-01 | 5.704E-03 | 1.950E-01  | -1.956E+10 | -1.950E+00 | -7.777E+00 | 3.452E-02  | 1.160E+01  | 0.000616  | -1.212323 |
| 187 | A | 3.716E-01 | 5.269E-03 | 1.956E-01  | -1.961E+10 | -1.956E+00 | -7.804E+00 | 3.753E-02  | 1.108E+01  | 0.002584  | -1.228999 |
| 188 | A | 1.181E+02 | 5.207E+00 | 1.092E-01  | -1.092E+65 | -1.092E+05 | -4.369E+05 | 2.330E+03  | 1.600E+07  | 0.000006  | -1.000007 |
| 189 | A | 1.181E+02 | 5.186E+00 | 1.092E-01  | -1.092E+65 | -1.092E+05 | -4.368E+05 | 2.274E+03  | 1.725E+07  | 0.000006  | -1.000008 |
| 190 | A | 3.700E-01 | 5.816E-03 | 1.954E-01  | -1.960E+10 | -1.954E+00 | -7.792E+00 | 3.684E-02  | 1.157E+01  | 0.000521  | -1.213000 |
| 191 | A | 3.726E-01 | 5.547E-03 | 1.960E-01  | -1.966E+10 | -1.960E+00 | -7.819E+00 | 3.906E-02  | 1.106E+01  | 0.002629  | -1.229393 |
| 192 | A | 3.716E-01 | 5.269E-03 | 1.956E-01  | -1.961E+10 | -1.956E+00 | -7.804E+00 | 3.754E-02  | 1.108E+01  | 0.002584  | -1.229003 |
| 193 | B | 3.121E-01 | 9.902E-02 | 3.130E-01  | -4.120E-01 | -3.130E-01 | -8.558E-01 | 4.526E-03  | 7.307E-01  | 0.201030  | 1.995911  |
| 194 | B | 3.122E-01 | 9.872E-02 | 3.129E-01  | -4.117E-01 | -3.129E-01 | -8.569E-01 | 4.607E-03  | 7.282E-01  | 0.196712  | 1.990682  |
| 195 | B | 3.097E-01 | 9.948E-02 | 3.082E-01  | -4.077E-01 | -3.082E-01 | -8.349E-01 | 4.659E-03  | 7.252E-01  | 0.204470  | 1.943666  |
| 196 | R | 2.016E-02 | 3.055E-02 | -8.846E-01 | -2.170E-13 | 8.846E-03  | 1.576E-01  | -9.082E-04 | 1.674E-02  | -1.182315 | 0.174593  |
| 197 | B | 2.420E-01 | 5.522E-02 | 1.911E-01  | -2.463E-01 | -1.911E-01 | -5.434E-01 | 2.857E-03  | 4.870E-01  | 0.012066  | 1.307199  |
| 198 | B | 3.122E-01 | 9.872E-02 | 3.129E-01  | -4.117E-01 | -3.129E-01 | -8.569E-01 | 4.606E-03  | 7.282E-01  | 0.196729  | 1.990700  |
| 199 | B | 3.117E-01 | 9.971E-02 | 3.118E-01  | -4.115E-01 | -3.118E-01 | -8.484E-01 | 4.919E-03  | 7.244E-01  | 0.197892  | 1.961238  |
| 200 | B | 2.503E-01 | 5.831E-02 | 2.039E-01  | -2.622E-01 | -2.039E-01 | -5.824E-01 | 3.379E-03  | 5.167E-01  | 0.031448  | 1.360793  |
| 201 | B | 3.121E-01 | 9.902E-02 | 3.130E-01  | -4.120E-01 | -3.130E-01 | -8.558E-01 | 4.525E-03  | 7.307E-01  | 0.201024  | 1.995869  |
| 202 | B | 8.448E-03 | 5.412E-03 | -1.630E-01 | -3.782E-23 | 1.630E-03  | 2.817E-02  | -1.418E-04 | -8.014E-02 | 1.033922  | 0.152402  |
| 203 | B | 2.382E-01 | 5.524E-02 | 1.867E-01  | -2.419E-01 | -1.867E-01 | -5.257E-01 | 3.274E-03  | 4.667E-01  | 0.012204  | 1.289982  |
| 204 | B | 3.040E-01 | 9.791E-02 | 2.989E-01  | -3.969E-01 | -2.989E-01 | -8.041E-01 | 4.843E-03  | 7.238E-01  | 0.238586  | 1.906846  |
| 205 | B | 7.294E-03 | 5.655E-03 | -7.029E-01 | -4.952E-24 | 7.029E-04  | 2.543E-02  | -2.823E-04 | -1.944E-01 | 1.418409  | 0.149530  |
| 206 | B | 2.977E-01 | 8.740E-02 | 2.843E-01  | -3.717E-01 | -2.843E-01 | -7.876E-01 | 3.193E-03  | 7.324E-01  | 0.154998  | 1.784980  |
| 207 | B | 3.117E-01 | 9.971E-02 | 3.118E-01  | -4.115E-01 | -3.118E-01 | -8.484E-01 | 4.918E-03  | 7.244E-01  | 0.197874  | 1.961193  |
| 208 | B | 3.051E-01 | 9.655E-02 | 3.010E-01  | -3.975E-01 | -3.010E-01 | -8.177E-01 | 5.043E-03  | 7.181E-01  | 0.222348  | 1.912867  |
| 209 | R | 7.448E-03 | 6.101E-03 | -1.570E-01 | -4.532E-23 | 1.570E-03  | 3.068E-02  | -1.580E-04 | -6.278E-02 | -1.598212 | 0.134069  |
| 210 | R | 7.208E-03 | 5.672E-03 | -9.680E-01 | -4.704E-24 | 9.680E-04  | 2.656E-02  | -3.164E-04 | -1.584E-01 | -2.461138 | 0.120122  |
| 211 | R | 2.016E-02 | 3.055E-02 | -8.846E-01 | -2.170E-13 | 8.846E-03  | 1.576E-01  | -9.079E-04 | 1.676E-02  | -1.182314 | 0.174579  |
| 212 | B | 3.168E-01 | 1.046E-01 | 3.226E-01  | -4.271E-01 | -3.226E-01 | -8.721E-01 | 3.237E-03  | 8.000E-01  | 0.232108  | 2.075198  |
| 213 | B | 2.422E-01 | 3.678E-01 | 1.438E-01  | -5.115E-01 | -1.438E-01 | 8.960E-01  | -1.036E-02 | 8.443E-01  | 0.022660  | 0.245808  |
| 214 | R | 3.283E-03 | 2.507E-03 | -6.271E-01 | -1.880E-24 | 6.271E-04  | 1.253E-02  | -1.004E-04 | -1.704E-01 | -1.224314 | 0.151016  |
| 215 | B | 2.422E-01 | 3.678E-01 | 1.438E-01  | -5.115E-01 | -1.438E-01 | 8.960E-01  | -1.036E-02 | 8.442E-01  | 0.022686  | 0.245801  |
| 216 | B | 3.097E-01 | 9.948E-02 | 3.082E-01  | -4.077E-01 | -3.082E-01 | -8.349E-01 | 4.657E-03  | 7.252E-01  | 0.204496  | 1.943614  |
| 217 | B | 2.515E-01 | 5.945E-02 | 2.069E-01  | -2.664E-01 | -2.069E-01 | -5.898E-01 | 3.635E-03  | 5.129E-01  | 0.029685  | 1.374281  |
| 218 | B | 8.230E-03 | 6.254E-03 | -1.228E-01 | -5.026E-23 | 1.228E-03  | 2.993E-02  | -2.357E-04 | -1.801E-01 | 1.001119  | 0.146798  |
| 219 | B | 6.957E-03 | 5.362E-03 | -1.315E-01 | -4.047E-23 | 1.315E-03  | 2.671E-02  | -2.270E-04 | -1.719E-01 | 0.164595  | 0.160361  |
| 220 | B | 2.879E-01 | 1.714E-01 | 3.902E-01  | -5.616E-01 | -3.902E-01 | -8.751E-01 | 5.552E-03  | 1.179E+00  | 0.020272  | 2.285061  |
| 221 | B | 2.430E-01 | 5.575E-02 | 1.925E-01  | -2.482E-01 | -1.925E-01 | -5.469E-01 | 3.421E-03  | 4.649E-01  | 0.013556  | 1.313080  |
| 222 | B | 3.190E-01 | 1.054E-01 | 3.278E-01  | -4.332E-01 | -3.278E-01 | -8.893E-01 | 4.048E-03  | 8.118E-01  | 0.206767  | 2.072477  |
| 223 | B | 5.359E-03 | 4.074E-03 | -1.136E-01 | -2.937E-23 | 1.136E-03  | 2.084E-02  | -1.919E-04 | -1.716E-01 | 0.213327  | 0.150327  |
| 224 | R | 2.814E-03 | 2.220E-03 | -5.857E-01 | -1.634E-24 | 5.857E-04  | 1.122E-02  | -9.273E-05 | -1.716E-01 | -2.097606 | 0.112182  |
| 225 | B | 2.515E-01 | 5.946E-02 | 2.069E-01  | -2.664E-01 | -2.069E-01 | -5.898E-01 | 3.635E-03  | 5.129E-01  | 0.029672  | 1.374346  |
| 226 | R | 2.804E-03 | 2.212E-03 | -5.846E-01 | -1.627E-24 | 5.846E-04  | 1.119E-02  | -9.245E-05 | -1.716E-01 | -2.094974 | 0.112087  |
| 227 | B | 2.430E-01 | 5.575E-02 | 1.925E-01  | -2.482E-01 | -1.925E-01 | -5.470E-01 | 3.421E-03  | 4.649E-01  | 0.013555  | 1.313148  |
| 228 | R | 7.181E-03 | 6.314E-03 | -1.202E-01 | -5.112E-23 | 1.202E-03  | 3.007E-02  | -2.440E-04 | -1.645E-01 | -1.856282 | 0.160401  |
| 229 | R | 2.024E-02 | 3.027E-02 | -8.619E-01 | -2.165E-13 | 8.619E-03  | 1.556E-01  | -6.391E-04 | 6.469E-02  | -1.215190 | 0.166214  |
| 230 | B | 3.051E-01 | 9.655E-02 | 3.010E-01  | -3.975E-01 | -3.010E-01 | -8.177E-01 | 5.042E-03  | 7.181E-01  | 0.222373  | 1.912801  |
| 231 | B | 2.231E-01 | 3.357E-01 | 1.190E-01  | -4.547E-01 | -1.190E-01 | 8.667E-01  | -1.084E-02 | 7.899E-01  | 0.028365  | 0.237980  |
| 232 | B | 2.384E-01 | 5.546E-02 | 1.868E-01  | -2.423E-01 | -1.868E-01 | -5.255E-01 | 2.972E-03  | 4.675E-01  | 0.019804  | 1.291279  |
| 233 | R | 3.718E-03 | 2.430E-03 | -5.098E-01 | -1.921E-24 | 5.098E-04  | 1.176E-02  | -9.418E-05 | -1.390E-01 | -2.263980 | 0.155093  |
| 234 | B | 2.384E-01 | 5.546E-02 | 1.868E-01  | -2.423E-01 | -1.868E-01 | -5.254E-01 | 2.972E-03  | 4.675E-01  | 0.019803  | 1.291254  |
| 235 | B | 1.402E-01 | 1.877E-01 | 3.481E-01  | -2.225E+00 | -3.481E-02 | 6.116E-01  | -8.216E-03 | 5.497E-01  | 0.038809  | 0.213227  |
| 236 | B | 5.372E-02 | 5.777E-02 | 1.188E-01  | -5.896E-13 | -1.188E-03 | 2.263E-01  | -4.100E-03 |            |           |           |

|     |   |           |           |            |            |            |            |            |            |             |          |
|-----|---|-----------|-----------|------------|------------|------------|------------|------------|------------|-------------|----------|
| 242 | B | 2.975E-01 | 8.611E-02 | 2.835E-01  | -3.696E-01 | -2.835E-01 | -7.894E-01 | 2.945E-03  | 7.363E-01  | 0.146615    | 1.765778 |
| 243 | B | 8.216E-03 | 6.241E-03 | -1.227E-01 | -5.014E-23 | 1.227E-03  | 2.987E-02  | -2.352E-04 | -1.802E-01 | 1.014221    | 0.146906 |
| 244 | B | 2.231E-01 | 3.357E-01 | 1.190E-01  | -4.547E-01 | -1.190E-01 | 8.668E-01  | -1.084E-02 | 7.899E-01  | 0.028381    | 0.237973 |
| 245 | C | 2.023E-03 | 1.965E-03 | -6.226E-01 | -1.342E-24 | 6.226E-04  | 1.035E-02  | -9.193E-05 | -1.794E-01 | -0.092382   | 0.469506 |
| 246 | B | 8.451E-03 | 5.415E-03 | -1.631E-01 | -3.784E-23 | 1.631E-03  | 2.818E-02  | -1.418E-04 | -8.012E-02 | 1.033833    | 0.152374 |
| 247 | B | 2.702E-01 | 6.782E-02 | 2.346E-01  | -3.024E-01 | -2.346E-01 | -6.672E-01 | 3.465E-03  | 6.395E-01  | 0.080007    | 1.473828 |
| 248 | R | 3.130E-02 | 2.969E-02 | -2.789E-01 | -2.941E-14 | 2.789E-04  | 1.199E-01  | -2.594E-03 | -4.577E-02 | -101.394303 | 0.174541 |
| 249 | B | 1.112E-01 | 1.343E-01 | 1.723E-01  | -1.516E+00 | -1.723E-02 | 4.683E-01  | -8.269E-03 | 4.398E-01  | 0.006933    | 0.207294 |
| 250 | B | 2.503E-01 | 5.831E-02 | 2.039E-01  | -2.622E-01 | -2.039E-01 | -5.824E-01 | 3.378E-03  | 5.168E-01  | 0.031518    | 1.360838 |
| 251 | B | 5.370E-02 | 5.774E-02 | 1.187E-01  | -5.892E-13 | -1.187E-03 | 2.262E-01  | -4.097E-03 | 2.039E-01  | 0.012010    | 0.175644 |
| 252 | C | 2.022E-03 | 1.963E-03 | -6.221E-01 | -1.341E-24 | 6.221E-04  | 1.034E-02  | -9.183E-05 | -1.793E-01 | -0.088578   | 0.468985 |
| 253 | B | 3.826E-01 | 4.706E-01 | 6.594E-01  | -1.130E+09 | -6.594E-01 | -7.554E-01 | 4.511E-03  | 1.882E+00  | 0.225448    | 1.044211 |
| 254 | B | 3.037E-01 | 9.015E-02 | 2.939E-01  | -3.841E-01 | -2.939E-01 | -8.152E-01 | 3.743E-03  | 7.346E-01  | 0.134819    | 1.765541 |
| 255 | B | 1.402E-01 | 1.877E-01 | 3.482E-01  | -2.225E+00 | -3.482E-02 | 6.117E-01  | -8.216E-03 | 5.498E-01  | 0.038841    | 0.213227 |
| 256 | R | 3.274E-03 | 2.501E-03 | -6.270E-01 | -1.874E-24 | 6.270E-04  | 1.251E-02  | -1.002E-04 | -1.704E-01 | -1.221303   | 0.148923 |
| 257 | B | 3.529E-02 | 4.108E-02 | -3.998E-01 | -4.068E-14 | 3.998E-04  | 1.659E-01  | -1.814E-03 | -4.732E-02 | 0.046052    | 0.150154 |
| 258 | B | 2.420E-01 | 5.522E-02 | 1.911E-01  | -2.463E-01 | -1.911E-01 | -5.434E-01 | 2.856E-03  | 4.870E-01  | 0.012054    | 1.307228 |
| 259 | R | 7.451E-03 | 6.104E-03 | -1.570E-01 | -4.534E-23 | 1.570E-03  | 3.070E-02  | -1.580E-04 | -6.276E-02 | -1.598085   | 0.134058 |
| 260 | R | 7.172E-03 | 6.306E-03 | -1.201E-01 | -5.105E-23 | 1.201E-03  | 3.003E-02  | -2.437E-04 | -1.646E-01 | -1.856463   | 0.160242 |
| 261 | B | 2.879E-01 | 1.713E-01 | 3.901E-01  | -5.614E-01 | -3.901E-01 | -8.751E-01 | 5.551E-03  | 1.178E+00  | 0.020226    | 2.284721 |
| 262 | B | 1.364E-01 | 1.781E-01 | 3.215E-01  | -2.103E+00 | -3.215E-02 | 5.840E-01  | -6.984E-03 | 5.352E-01  | 0.012516    | 0.212659 |
| 263 | B | 1.240E-01 | 1.561E-01 | 2.436E-01  | -1.804E+00 | -2.436E-02 | 5.269E-01  | -1.236E-02 | 4.866E-01  | 0.027145    | 0.211725 |
| 264 | R | 8.441E-03 | 6.650E-03 | -8.801E-01 | -5.770E-24 | 8.801E-04  | 3.012E-02  | -4.691E-04 | -1.238E-01 | -1.138160   | 0.031672 |
| 265 | R | 3.245E-03 | 2.644E-03 | -7.579E-01 | -1.886E-24 | 7.579E-04  | 1.361E-02  | -1.130E-04 | -1.720E-01 | -1.359896   | 0.112005 |
| 266 | B | 3.076E-01 | 9.099E-02 | 3.018E-01  | -3.928E-01 | -3.018E-01 | -8.431E-01 | 3.465E-03  | 7.597E-01  | 0.139822    | 1.846327 |
| 267 | B | 4.137E-02 | 4.552E-02 | 2.470E-01  | -4.799E-13 | -2.470E-03 | 1.722E-01  | -1.362E-03 | -2.719E-02 | 0.080087    | 0.166843 |
| 268 | R | 2.250E-02 | 1.891E-02 | 1.230E-01  | -2.014E-13 | -1.230E-03 | 7.073E-02  | -1.982E-03 | -5.009E-02 | -2.024117   | 0.211478 |
| 269 | B | 5.330E-03 | 4.049E-03 | -1.132E-01 | -2.918E-23 | 1.132E-03  | 2.072E-02  | -1.908E-04 | -1.716E-01 | 0.219056    | 0.150199 |
| 270 | C | 8.431E-03 | 6.505E-03 | -8.008E-01 | -5.705E-24 | 8.008E-04  | 2.922E-02  | -4.610E-04 | -1.229E-01 | -0.899649   | 0.032970 |
| 271 | B | 2.382E-01 | 5.524E-02 | 1.867E-01  | -2.419E-01 | -1.867E-01 | -5.257E-01 | 3.273E-03  | 4.668E-01  | 0.012209    | 1.289970 |
| 272 | R | 3.011E-02 | 2.738E-02 | 1.558E-01  | -2.894E-13 | -1.558E-03 | 1.033E-01  | -2.774E-03 | 4.523E-03  | -2.013802   | 0.214011 |
| 273 | B | 4.820E-02 | 4.828E-02 | 2.217E-01  | -5.050E-13 | -2.217E-03 | 1.843E-01  | -4.060E-03 | 1.568E-01  | 0.049001    | 0.178676 |
| 274 | R | 7.243E-03 | 5.041E-03 | -1.034E-01 | -4.007E-23 | 1.034E-03  | 2.430E-02  | -1.967E-04 | -1.280E-01 | -2.051233   | 0.206930 |
| 275 | B | 4.822E-02 | 4.831E-02 | 2.218E-01  | -5.053E-13 | -2.218E-03 | 1.844E-01  | -4.063E-03 | 1.569E-01  | 0.048875    | 0.178691 |
| 276 | R | 3.966E-02 | 6.410E-02 | -9.599E-01 | -5.450E-13 | 9.599E-03  | 2.948E-01  | -1.494E-03 | 1.534E-01  | -1.264033   | 0.226152 |
| 277 | B | 2.977E-01 | 8.740E-02 | 2.843E-01  | -3.717E-01 | -2.843E-01 | -7.876E-01 | 3.192E-03  | 7.324E-01  | 0.154999    | 1.784983 |
| 278 | R | 6.987E-03 | 5.690E-03 | -8.487E-01 | -4.841E-24 | 8.487E-04  | 2.615E-02  | -3.153E-04 | -1.403E-01 | -1.308178   | 0.109670 |
| 279 | R | 6.983E-03 | 5.684E-03 | -8.488E-01 | -4.836E-24 | 8.488E-04  | 2.613E-02  | -3.150E-04 | -1.402E-01 | -1.306947   | 0.109424 |
| 280 | B | 1.458E-02 | 1.257E-02 | -2.100E-01 | -1.047E-13 | 2.100E-03  | 5.869E-02  | -4.616E-04 | -1.414E-01 | 0.094904    | 0.178711 |
| 281 | R | 2.250E-02 | 1.891E-02 | 1.230E-01  | -2.014E-13 | -1.230E-03 | 7.072E-02  | -1.982E-03 | -5.011E-02 | -2.024707   | 0.211489 |
| 282 | R | 3.011E-02 | 2.737E-02 | 1.558E-01  | -2.893E-13 | -1.558E-03 | 1.033E-01  | -2.774E-03 | 4.511E-03  | -2.013492   | 0.214023 |
| 283 | R | 2.339E-02 | 1.995E-02 | 1.096E-01  | -2.105E-13 | -1.096E-03 | 7.541E-02  | -1.288E-03 | -3.210E-02 | -2.345529   | 0.205155 |
| 284 | B | 2.580E-01 | 5.734E-02 | 2.135E-01  | -2.708E-01 | -2.135E-01 | -6.246E-01 | 3.584E-03  | 5.645E-01  | 0.100603    | 1.397659 |
| 285 | C | 1.412E-02 | 1.397E-02 | 1.104E-01  | -1.408E-14 | -1.104E-04 | 5.544E-02  | -2.560E-03 | -1.134E-01 | -0.198257   | 0.646349 |
| 286 | B | 1.461E-02 | 1.260E-02 | -2.102E-01 | -1.050E-13 | 2.102E-03  | 5.880E-02  | -4.624E-04 | -1.413E-01 | 0.094377    | 0.178745 |
| 287 | B | 2.975E-01 | 8.611E-02 | 2.835E-01  | -3.696E-01 | -2.835E-01 | -7.894E-01 | 2.945E-03  | 7.363E-01  | 0.146613    | 1.765781 |
| 288 | R | 1.013E-02 | 7.617E-03 | -4.400E-01 | -7.177E-24 | 4.400E-04  | 3.223E-02  | -4.931E-04 | -1.286E-01 | -1.462382   | 0.178667 |
| 289 | B | 2.403E-01 | 3.545E-01 | 1.411E-01  | -4.956E-01 | -1.411E-01 | 8.533E-01  | -7.875E-03 | 8.431E-01  | 0.009273    | 0.250100 |
| 290 | B | 3.531E-02 | 4.112E-02 | -3.976E-01 | -4.072E-14 | 3.976E-04  | 1.661E-01  | -1.816E-03 | -4.723E-02 | 0.045976    | 0.150149 |
| 291 | R | 1.533E-02 | 1.500E-02 | -2.611E-01 | -1.239E-13 | 2.611E-03  | 7.043E-02  | -4.951E-04 | -7.728E-02 | -1.553899   | 0.160404 |
| 292 | B | 6.032E-02 | 6.847E-02 | 2.180E-01  | -6.869E-14 | -2.180E-04 | 2.730E-01  | -3.621E-03 | 2.457E-01  | 0.017361    | 0.177472 |
| 293 | R | 7.250E-03 | 5.046E-03 | -1.036E-01 | -4.010E-23 | 1.036E-03  | 2.433E-02  | -1.970E-04 | -1.279E-01 | -2.058750   | 0.206628 |
| 294 | B | 2.263E-01 | 3.437E-01 | 1.232E-01  | -4.669E-01 | -1.232E-01 | 8.818E-01  | -1.458E-02 | 8.132E-01  | 0.021371    | 0.236570 |
| 295 | B | 3.371E-02 | 3.919E-02 | -6.223E-01 | -3.857E-14 | 6.223E-04  | 1.593E-01  | -1.892E-03 | -4.293E-02 | 0.060486    | 0.148639 |
| 296 | B | 2.055E-01 | 3.109E-01 | 9.720E-01  | -4.081E+00 | -9.720E-02 | 8.546E-01  | -1.541E-02 | 7.520E-01  | 0.076889    | 0.231859 |
| 297 | B | 3.190E-01 | 1.054E-01 | 3.277E-01  | -4.332E-01 | -3.277E-01 | -8.893E-01 | 4.047E-03  | 8.118E-01  | 0.206768    | 2.072433 |
| 298 | B | 3.037E-01 | 9.015E-02 | 2.939E-01  | -3.841E-01 | -2.939E-01 | -8.152E-01 | 3.743E-03  | 7.346E-01  | 0.134826    | 1.765536 |
| 299 | B | 1.240E-01 | 1.561E-01 | 2.435E-01  | -1.804E+00 | -2.435E-02 | 5.269E-01  | -1.236E-02 | 4.866E-01  | 0.027159    | 0.211720 |
| 300 | R | 3.736E-03 | 2.438E-03 | -5.110E-01 | -1.928E-24 | 5.110E-04  | 1.180E-02  | -9.448E-05 | -1.389E-01 | -2.283783   | 0.156100 |
| 301 | B | 1.364E-01 | 1.781E-01 | 3.214E-01  | -2.103E+00 | -3.214E-02 | 5.840E-01  | -6.983E-03 | 5.351E-01  | 0.012516    | 0.212657 |
| 302 | R | 2.023E-02 | 1.738E-02 | 9.979E-01  | -1.838E-14 | -9.979E-04 | 6.553E-02  | -1.223E-03 | -3.161E-02 | -1.560848   | 0.202091 |
| 303 | R | 2.339E-02 | 1.995E-02 | 1.097E-01  | -2.105E-13 | -1.097E-03 | 7.542E-02  | -1.288E-03 | -3.206E-02 | -2.344664   | 0.205185 |
| 304 | B | 2.175E-01 | 3.259E-01 | 1.120E-01  | -4.379E-01 | -1.120E-01 | 8.556E-01  | -8.769E-03 | 7.750E-01  | 0.031057    | 0.236131 |
| 305 | R | 1.013E-02 | 7.618E-03 | -4.399E-01 | -7.178E-24 | 4.399E-04  | 3.223E-02  | -4.932E-04 | -1.286E-01 | -1.462586   | 0.178692 |
| 306 | R | 1.097E-02 | 8.361E-03 | -4.397E-01 | -7.921E-24 | 4.397E-04  | 3.520E-02  | -5.720E-04 | -1.161E-01 | -1.578775   | 0.170570 |
| 307 | B | 3.168E-01 | 1.046E-01 | 3.226E-01  | -4.271E-01 | -3.226E-01 | -8.721E-01 | 3.237E-03  | 8.000E-01  | 0.232104    | 2.075201 |
| 308 | R | 6.532E-04 | 4.426E-04 | -1.715E-01 | -2.711E-34 | 1.715E-04  | 2.457E-03  | -1.297E-05 | -1.177E-01 | -1.684196   | 0.124159 |
| 309 | B | 2.928E-02 | 2.759E-02 | 1.520E-01  | -2.910E-13 | -1.520E-03 | 1.043E-01  | -1.779E-03 | 7.508E-02  | 0.279350    | 0.165538 |
| 310 | B | 5.230E-02 | 5.359E-02 | 2.323E-01  | -5.591E-13 | -2.323E-03 | 2.051E-01  | -8.277E-03 | 1.688E-01  | 0.007086    | 0.176282 |
| 311 | B | 1.201E-02 | 9.789E-03 | -5.493E-01 | -9.240E-24 | 5.493E-04  | 4.136E-02  | -6.492E-04 | -1.250E-01 | 0.019458    | 0.108892 |
| 312 | B | 8.873E-02 | 1.001E-01 | 8.879E-01  | -1.089E+01 | -8.879E-03 | 3.647E-01  | -1.325E-02 | 3.273E-01  | 0.016234    | 0.197540 |
| 313 | B | 6.957E-03 | 5.401E-03 | -1.370E-01 | -4.031E-23 | 1.370E-03  | 2.708E-02  | -2.606E-04 | -1.659E-01 | 0.127312    | 0.160736 |
| 314 | R | 2.024E-02 | 3.027E-02 | -8.619E-01 | -2.165E-13 | 8.619E-03  | 1.556E-01  | -6.391E-04 | 6.470E-02  | -1.215189   | 0.166214 |
| 315 | B | 3.357E-02 | 3.838E-02 | -6.048E-01 | -3.777E-14 | 6.048E-04  | 1.559E-01  | -1.556E-03 | -5.788E-02 | 0.044147    | 0.148699 |
| 316 | B | 3.826E-01 | 4.705E-01 | 6.594E-01  | -1.130E+09 | -6.594E-01 | -7.555E-01 | 4.512E-03  | 1.882E+00  | 0.225449    | 1.044478 |
| 317 | B | 4.135E-02 | 4.549E-02 | 2.463E-01  | -4.795E-13 | -2.463E-03 | 1.721E-01  | -1.361E-03 | -2.728E-02 | 0.080089    | 0.166828 |
| 318 | B | 2.702E-01 | 6.781E-02 | 2.346E-01  | -3.024E-01 | -2.346E-01 | -6.672E-01 | 3.465E-03  | 6.394E-01  | 0.079988    | 1.473789 |
| 319 | R | 8.587E-03 | 6.282E-03 | -5.470E-01 | -5.735E-24 | 5.470E-04  | 2.732E-02  | -3.824E-04 | -1.296E-01 | -1.381352   | 0.179556 |
| 320 | R | 4.874E-04 | 3.882E-04 | -1.704E-01 | -2.178E-34 | 1.704E-04  | 2.235E-03  | -1.365E-05 | -1.476E-01 | -1.172536   | 0.078940 |
| 321 | R | 2.483E-02 | 2.068E-02 | 1.048E-01  | -2.173E-13 | -1.048E-03 | 7.855E-02  | -1.750E+01 |            |             |          |

|     |   |           |           |            |            |            |            |            |            |            |             |
|-----|---|-----------|-----------|------------|------------|------------|------------|------------|------------|------------|-------------|
| 327 | B | 3.358E-02 | 3.839E-02 | -6.042E-01 | -3.779E-14 | 6.042E-04  | 1.560E-01  | -1.557E-03 | -5.785E-02 | 0.044138   | 0.148699    |
| 328 | R | 2.024E-02 | 3.027E-02 | -8.619E-01 | -2.165E-13 | 8.619E-03  | 1.556E-01  | -6.391E-04 | 6.469E-02  | -1.215188  | 0.166215    |
| 329 | B | 6.968E-03 | 5.410E-03 | -1.372E-01 | -4.038E-23 | 1.372E-03  | 2.713E-02  | -2.610E-04 | -1.658E-01 | 0.127278   | 0.160773    |
| 330 | A | 2.198E+00 | 6.816E+00 | 1.432E-01  | -2.114E+21 | -1.432E+01 | -3.003E+01 | 3.150E-01  | 9.639E+00  | 108.802596 | -149.911713 |
| 331 | C | 4.321E-04 | 3.683E-04 | -1.634E-01 | -2.049E-34 | 1.634E-04  | 2.127E-03  | -1.274E-05 | -1.373E-01 | -0.497666  | 0.161383    |
| 332 | B | 8.873E-02 | 1.001E-01 | 8.879E-01  | -1.089E+01 | -8.879E-03 | 3.648E-01  | -1.326E-02 | 3.273E-01  | 0.016236   | 0.197540    |
| 333 | B | 1.201E-02 | 9.790E-03 | -5.493E-01 | -9.241E-24 | 5.493E-04  | 4.136E-02  | -6.493E-04 | -1.250E-01 | 0.019271   | 0.108892    |
| 334 | B | 5.229E-02 | 5.358E-02 | 2.323E-01  | -5.590E-13 | -2.323E-03 | 2.050E-01  | -8.277E-03 | 1.688E-01  | 0.007104   | 0.176279    |
| 335 | B | 2.928E-02 | 2.758E-02 | 1.520E-01  | -2.910E-13 | -1.520E-03 | 1.043E-01  | -1.778E-03 | 7.508E-02  | 0.279364   | 0.165544    |
| 336 | R | 6.545E-04 | 4.434E-04 | -1.717E-01 | -2.718E-34 | 1.717E-04  | 2.460E-03  | -1.299E-05 | -1.177E-01 | -1.683897  | 0.124303    |
| 337 | B | 3.168E-01 | 1.046E-01 | 3.226E-01  | -4.272E-01 | -3.226E-01 | -8.721E-01 | 3.237E-03  | 8.000E-01  | 0.232105   | 2.075212    |
| 338 | R | 1.097E-02 | 8.360E-03 | -4.396E-01 | -7.920E-24 | 4.396E-04  | 3.520E-02  | -5.720E-04 | -1.160E-01 | -1.578580  | 0.170614    |
| 339 | R | 1.012E-02 | 7.617E-03 | -4.400E-01 | -7.177E-24 | 4.400E-04  | 3.223E-02  | -4.931E-04 | -1.286E-01 | -1.462441  | 0.178671    |
| 340 | B | 2.175E-01 | 3.259E-01 | 1.120E-01  | -4.379E-01 | -1.120E-01 | 8.556E-01  | -8.769E-03 | 7.750E-01  | 0.031060   | 0.236131    |
| 341 | R | 2.339E-02 | 1.995E-02 | 1.097E-01  | -2.105E-13 | -1.097E-03 | 7.541E-02  | -1.288E-03 | -3.206E-02 | -2.344711  | 0.205178    |
| 342 | R | 2.023E-02 | 1.738E-02 | 9.979E-01  | -1.838E-14 | -9.979E-04 | 6.554E-02  | -1.224E-03 | -3.161E-02 | -1.560872  | 0.202092    |
| 343 | B | 1.364E-01 | 1.781E-01 | 3.215E-01  | -2.103E+00 | -3.215E-02 | 5.840E-01  | -6.983E-03 | 5.351E-01  | 0.012522   | 0.212660    |
| 344 | R | 3.739E-03 | 2.440E-03 | -5.111E-01 | -1.929E-24 | 5.111E-04  | 1.181E-02  | -9.453E-05 | -1.389E-01 | -2.286025  | 0.156207    |
| 345 | B | 1.240E-01 | 1.561E-01 | 2.435E-01  | -1.804E+00 | -2.435E-02 | 5.269E-01  | -1.236E-02 | 4.866E-01  | 0.027158   | 0.211724    |
| 346 | B | 3.037E-01 | 9.015E-02 | 2.939E-01  | -3.841E-01 | -2.939E-01 | -8.152E-01 | 3.743E-03  | 7.346E-01  | 0.134826   | 1.765550    |
| 347 | R | 4.218E-03 | 2.849E-03 | -8.045E-01 | -2.045E-24 | 8.045E-04  | 1.462E-02  | -1.369E-04 | -1.494E-01 | -1.629948  | 0.089949    |
| 348 | B | 3.190E-01 | 1.054E-01 | 3.278E-01  | -4.332E-01 | -3.278E-01 | -8.893E-01 | 4.047E-03  | 8.118E-01  | 0.206770   | 2.072455    |
| 349 | B | 2.055E-01 | 3.109E-01 | 9.721E-01  | -4.081E+00 | -9.721E-02 | 8.546E-01  | -1.541E-02 | 7.520E-01  | 0.076892   | 0.231866    |
| 350 | B | 3.370E-02 | 3.917E-02 | -6.231E-01 | -3.855E-14 | 6.231E-04  | 1.592E-01  | -1.891E-03 | -4.298E-02 | 0.060530   | 0.148641    |
| 351 | B | 2.263E-01 | 3.436E-01 | 1.232E-01  | -4.669E-01 | -1.232E-01 | 8.817E-01  | -1.458E-02 | 8.131E-01  | 0.021368   | 0.236571    |
| 352 | R | 7.249E-03 | 5.045E-03 | -1.036E-01 | -4.009E-23 | 1.036E-03  | 2.432E-02  | -1.969E-04 | -1.279E-01 | -2.058122  | 0.206676    |
| 353 | B | 6.033E-02 | 6.848E-02 | 2.177E-01  | -6.869E-14 | -2.177E-04 | 2.730E-01  | -3.622E-03 | 2.457E-01  | 0.017350   | 0.177470    |
| 354 | R | 1.533E-02 | 1.499E-02 | -2.609E-01 | -1.238E-13 | 2.609E-03  | 7.041E-02  | -4.950E-04 | -7.731E-02 | -1.554199  | 0.160402    |
| 355 | B | 3.530E-02 | 4.110E-02 | -3.991E-01 | -4.070E-14 | 3.991E-04  | 1.660E-01  | -1.815E-03 | -4.728E-02 | 0.045974   | 0.150149    |
| 356 | B | 2.403E-01 | 3.545E-01 | 1.411E-01  | -4.956E-01 | -1.411E-01 | 8.533E-01  | -7.875E-03 | 8.431E-01  | 0.009274   | 0.250101    |
| 357 | R | 1.013E-02 | 7.618E-03 | -4.399E-01 | -7.178E-24 | 4.399E-04  | 3.223E-02  | -4.932E-04 | -1.286E-01 | -1.462461  | 0.178686    |
| 358 | B | 2.975E-01 | 8.611E-02 | 2.835E-01  | -3.696E-01 | -2.835E-01 | -7.894E-01 | 2.945E-03  | 7.363E-01  | 0.146615   | 1.765800    |
| 359 | B | 1.461E-02 | 1.260E-02 | -2.102E-01 | -1.050E-13 | 2.102E-03  | 5.882E-02  | -4.626E-04 | -1.413E-01 | 0.094447   | 0.178752    |
| 360 | C | 1.412E-02 | 1.397E-02 | 1.103E-01  | -1.408E-14 | -1.103E-04 | 5.544E-02  | -2.559E-03 | -1.135E-01 | -0.198268  | 0.646299    |
| 361 | B | 2.580E-01 | 5.734E-02 | 2.135E-01  | -2.708E-01 | -2.135E-01 | -6.246E-01 | 3.584E-03  | 5.645E-01  | 0.100606   | 1.397670    |
| 362 | R | 2.339E-02 | 1.995E-02 | 1.096E-01  | -2.104E-13 | -1.096E-03 | 7.541E-02  | -1.288E-03 | -3.210E-02 | -2.345576  | 0.205162    |
| 363 | R | 3.011E-02 | 2.738E-02 | 1.557E-01  | -2.894E-13 | -1.557E-03 | 1.033E-01  | -2.774E-03 | 4.509E-03  | -2.013704  | 0.214005    |
| 364 | R | 2.250E-02 | 1.891E-02 | 1.230E-01  | -2.014E-13 | -1.230E-03 | 7.072E-02  | -1.981E-03 | -5.010E-02 | -2.024209  | 0.211493    |
| 365 | B | 1.458E-02 | 1.257E-02 | -2.100E-01 | -1.047E-13 | 2.100E-03  | 5.869E-02  | -4.615E-04 | -1.414E-01 | 0.094874   | 0.178704    |
| 366 | R | 6.986E-03 | 5.688E-03 | -8.488E-01 | -4.839E-24 | 8.488E-04  | 2.615E-02  | -3.152E-04 | -1.403E-01 | -1.307769  | 0.109557    |
| 367 | R | 6.986E-03 | 5.688E-03 | -8.486E-01 | -4.839E-24 | 8.486E-04  | 2.615E-02  | -3.152E-04 | -1.403E-01 | -1.308061  | 0.109630    |
| 368 | B | 2.977E-01 | 8.740E-02 | 2.843E-01  | -3.717E-01 | -2.843E-01 | -7.875E-01 | 3.192E-03  | 7.324E-01  | 0.154998   | 1.784969    |
| 369 | R | 3.966E-02 | 6.410E-02 | -9.599E-01 | -5.450E-13 | 9.599E-03  | 2.948E-01  | -1.494E-03 | 1.534E-01  | -1.264034  | 0.226152    |
| 370 | B | 4.822E-02 | 4.831E-02 | 2.218E-01  | -5.053E-13 | -2.218E-03 | 1.844E-01  | -4.062E-03 | 1.569E-01  | 0.048889   | 0.178692    |
| 371 | R | 7.246E-03 | 5.044E-03 | -1.035E-01 | -4.009E-23 | 1.035E-03  | 2.432E-02  | -1.969E-04 | -1.280E-01 | -2.053179  | 0.206835    |
| 372 | B | 4.820E-02 | 4.829E-02 | 2.217E-01  | -5.051E-13 | -2.217E-03 | 1.843E-01  | -4.060E-03 | 1.568E-01  | 0.048983   | 0.178679    |
| 373 | R | 3.011E-02 | 2.738E-02 | 1.558E-01  | -2.894E-13 | -1.558E-03 | 1.033E-01  | -2.774E-03 | 4.521E-03  | -2.013810  | 0.214015    |
| 374 | B | 2.382E-01 | 5.524E-02 | 1.867E-01  | -2.419E-01 | -1.867E-01 | -5.257E-01 | 3.273E-03  | 4.668E-01  | 0.012210   | 1.289982    |
| 375 | B | 5.328E-03 | 4.048E-03 | -1.131E-01 | -2.916E-23 | 1.131E-03  | 2.072E-02  | -1.908E-04 | -1.716E-01 | 0.219768   | 0.150182    |
| 376 | R | 2.250E-02 | 1.891E-02 | 1.230E-01  | -2.014E-13 | -1.230E-03 | 7.072E-02  | -1.981E-03 | -5.011E-02 | -2.024049  | 0.211476    |
| 377 | B | 4.137E-02 | 4.552E-02 | 2.470E-01  | -4.799E-13 | -2.470E-03 | 1.722E-01  | -1.362E-03 | -2.720E-02 | 0.080074   | 0.166840    |
| 378 | B | 3.076E-01 | 9.099E-02 | 3.018E-01  | -3.928E-01 | -3.018E-01 | -8.431E-01 | 3.465E-03  | 7.597E-01  | 0.139821   | 1.846308    |
| 379 | R | 3.243E-03 | 2.642E-03 | -7.576E-01 | -1.885E-24 | 7.576E-04  | 1.360E-02  | -1.130E-04 | -1.721E-01 | -1.359580  | 0.111949    |
| 380 | B | 1.240E-01 | 1.561E-01 | 2.435E-01  | -1.804E+00 | -2.435E-02 | 5.268E-01  | -1.236E-02 | 4.866E-01  | 0.027147   | 0.211723    |
| 381 | B | 1.364E-01 | 1.782E-01 | 3.216E-01  | -2.103E+00 | -3.216E-02 | 5.840E-01  | -6.984E-03 | 5.352E-01  | 0.012529   | 0.212664    |
| 382 | B | 2.879E-01 | 1.713E-01 | 3.901E-01  | -5.614E-01 | -3.901E-01 | -8.750E-01 | 5.551E-03  | 1.178E+00  | 0.020204   | 2.284647    |
| 383 | R | 7.171E-03 | 6.305E-03 | -1.201E-01 | -5.104E-23 | 1.201E-03  | 3.003E-02  | -2.437E-04 | -1.646E-01 | -1.855994  | 0.160260    |
| 384 | R | 7.450E-03 | 6.103E-03 | -1.570E-01 | -4.533E-23 | 1.570E-03  | 3.069E-02  | -1.580E-04 | -6.276E-02 | -1.598211  | 0.134068    |
| 385 | B | 2.420E-01 | 5.522E-02 | 1.911E-01  | -2.463E-01 | -1.911E-01 | -5.434E-01 | 2.856E-03  | 4.870E-01  | 0.012052   | 1.307239    |
| 386 | B | 3.529E-02 | 4.109E-02 | -3.993E-01 | -4.069E-14 | 3.993E-04  | 1.660E-01  | -1.815E-03 | -4.729E-02 | 0.046032   | 0.150153    |
| 387 | R | 3.274E-03 | 2.501E-03 | -6.270E-01 | -1.874E-24 | 6.270E-04  | 1.251E-02  | -1.002E-04 | -1.704E-01 | -1.221113  | 0.148763    |
| 388 | B | 1.402E-01 | 1.877E-01 | 3.481E-01  | -2.225E+00 | -3.481E-02 | 6.116E-01  | -8.214E-03 | 5.497E-01  | 0.038821   | 0.213224    |
| 389 | B | 3.037E-01 | 9.015E-02 | 2.939E-01  | -3.841E-01 | -2.939E-01 | -8.152E-01 | 3.743E-03  | 7.346E-01  | 0.134841   | 1.765540    |
| 390 | B | 3.826E-01 | 4.706E-01 | 6.594E-01  | -1.130E+09 | -6.594E-01 | -7.553E-01 | 4.511E-03  | 1.882E+00  | 0.225499   | 1.044200    |
| 391 | C | 2.022E-03 | 1.964E-03 | -6.223E-01 | -1.341E-24 | 6.223E-04  | 1.034E-02  | -9.186E-05 | -1.793E-01 | -0.089166  | 0.469133    |
| 392 | B | 5.369E-02 | 5.771E-02 | 1.187E-01  | -5.890E-13 | -1.187E-03 | 2.261E-01  | -4.095E-03 | 2.038E-01  | 0.012026   | 0.175642    |
| 393 | B | 2.503E-01 | 5.831E-02 | 2.039E-01  | -2.622E-01 | -2.039E-01 | -5.824E-01 | 3.378E-03  | 5.167E-01  | 0.031523   | 1.360831    |
| 394 | B | 1.113E-01 | 1.343E-01 | 1.724E-01  | -1.516E+00 | -1.724E-02 | 4.684E-01  | -8.270E-03 | 4.398E-01  | 0.006921   | 0.207296    |
| 395 | R | 3.130E-02 | 2.968E-02 | -2.775E-01 | -2.941E-14 | 2.775E-04  | 1.198E-01  | -2.593E-03 | -4.577E-02 | -98.256345 | 0.174567    |
| 396 | B | 2.702E-01 | 6.782E-02 | 2.346E-01  | -3.024E-01 | -2.346E-01 | -6.672E-01 | 3.465E-03  | 6.394E-01  | 0.080007   | 1.473824    |
| 397 | B | 8.449E-03 | 5.414E-03 | -1.630E-01 | -3.784E-23 | 1.630E-03  | 2.818E-02  | -1.418E-04 | -8.012E-02 | 0.131297   | 0.152334    |
| 398 | C | 2.023E-03 | 1.965E-03 | -6.226E-01 | -1.342E-24 | 6.226E-04  | 1.035E-02  | -9.193E-05 | -1.794E-01 | -0.094304  | 0.469312    |
| 399 | B | 2.231E-01 | 3.357E-01 | 1.190E-01  | -4.547E-01 | -1.190E-01 | 8.668E-01  | -1.084E-02 | 7.899E-01  | 0.028376   | 0.237978    |
| 400 | B | 8.216E-03 | 6.241E-03 | -1.227E-01 | -5.014E-23 | 1.227E-03  | 2.987E-02  | -2.352E-04 | -1.802E-01 | 1.014111   | 0.146916    |
| 401 | B | 2.975E-01 | 8.611E-02 | 2.835E-01  | -3.696E-01 | -2.835E-01 | -7.894E-01 | 2.945E-03  | 7.363E-01  | 0.146614   | 1.765781    |
| 402 | R | 3.241E-03 | 2.640E-03 | -7.571E-01 | -1.883E-24 | 7.571E-04  | 1.359E-02  | -1.129E-04 | -1.721E-01 | -1.359248  | 0.111879    |
| 403 | B | 6.955E-03 | 5.399E-03 | -1.370E-01 | -4.029E-23 | 1.370E-03  | 2.707E-02  | -2.606E-04 | -1.659E-01 | 0.126095   | 0.160675    |
| 404 | B | 6.967E-03 | 5.370E-03 | -1.316E-01 | -4.054E-23 | 1.316E-03  | 2.674E-02  | -2.273E-04 | -1.719E-01 | 0.163954   | 0.160403    |
| 405 | B | 3.040E-01 | 9.792E-02 | 2.990E-01  | -3.969E-01 | -2.990E-01 | -8.042E-01 | 4.842E-03  | 7.239E-01  | 0.238591   | 1.906998    |
| 406 | B | 1.112E-01 |           |            |            |            |            |            |            |            |             |

|     |   |           |           |            |            |            |            |            |            |            |             |
|-----|---|-----------|-----------|------------|------------|------------|------------|------------|------------|------------|-------------|
| 412 | B | 2.231E-01 | 3.357E-01 | 1.190E-01  | -4.547E-01 | -1.190E-01 | 8.667E-01  | -1.084E-02 | 7.899E-01  | 0.028369   | 0.237982    |
| 413 | B | 3.051E-01 | 9.655E-02 | 3.010E-01  | -3.975E-01 | -3.010E-01 | -8.177E-01 | 5.042E-03  | 7.181E-01  | 0.222388   | 1.912844    |
| 414 | R | 2.024E-02 | 3.027E-02 | -8.619E-01 | -2.165E-13 | 8.619E-03  | 1.556E-01  | -6.391E-04 | 6.469E-02  | -1.215188  | 0.166216    |
| 415 | R | 7.178E-03 | 6.312E-03 | -1.202E-01 | -5.110E-23 | 1.202E-03  | 3.005E-02  | -2.439E-04 | -1.645E-01 | -1.855835  | 0.160378    |
| 416 | B | 2.430E-01 | 5.575E-02 | 1.925E-01  | -2.482E-01 | -1.925E-01 | -5.470E-01 | 3.421E-03  | 4.649E-01  | 0.013557   | 1.313157    |
| 417 | R | 2.806E-03 | 2.213E-03 | -5.849E-01 | -1.629E-24 | 5.849E-04  | 1.119E-02  | -9.251E-05 | -1.716E-01 | -2.097988  | 0.112134    |
| 418 | B | 2.515E-01 | 5.945E-02 | 2.069E-01  | -2.664E-01 | -2.069E-01 | -5.898E-01 | 3.635E-03  | 5.129E-01  | 0.029652   | 1.374310    |
| 419 | R | 2.815E-03 | 2.221E-03 | -5.858E-01 | -1.635E-24 | 5.858E-04  | 1.123E-02  | -9.276E-05 | -1.716E-01 | -2.094948  | 0.112165    |
| 420 | B | 5.350E-03 | 4.066E-03 | -1.135E-01 | -2.931E-23 | 1.135E-03  | 2.080E-02  | -1.916E-04 | -1.716E-01 | 0.214568   | 0.150276    |
| 421 | B | 3.190E-01 | 1.054E-01 | 3.278E-01  | -4.332E-01 | -3.278E-01 | -8.893E-01 | 4.048E-03  | 8.118E-01  | 0.206767   | 2.072470    |
| 422 | B | 2.430E-01 | 5.575E-02 | 1.925E-01  | -2.482E-01 | -1.925E-01 | -5.469E-01 | 3.421E-03  | 4.649E-01  | 0.013550   | 1.313103    |
| 423 | B | 2.879E-01 | 1.714E-01 | 3.902E-01  | -5.616E-01 | -3.902E-01 | -8.751E-01 | 5.552E-03  | 1.179E+00  | 0.020280   | 2.285049    |
| 424 | B | 6.960E-03 | 5.365E-03 | -1.315E-01 | -4.050E-23 | 1.315E-03  | 2.672E-02  | -2.271E-04 | -1.719E-01 | 0.164520   | 0.160379    |
| 425 | B | 8.228E-03 | 6.251E-03 | -1.228E-01 | -5.023E-23 | 1.228E-03  | 2.992E-02  | -2.356E-04 | -1.801E-01 | 1.005669   | 0.146857    |
| 426 | B | 2.515E-01 | 5.945E-02 | 2.069E-01  | -2.664E-01 | -2.069E-01 | -5.898E-01 | 3.635E-03  | 5.129E-01  | 0.029697   | 1.374280    |
| 427 | B | 3.097E-01 | 9.948E-02 | 3.082E-01  | -4.077E-01 | -3.082E-01 | -8.349E-01 | 4.657E-03  | 7.252E-01  | 0.204492   | 1.943576    |
| 428 | B | 2.422E-01 | 3.678E-01 | 1.438E-01  | -5.115E-01 | -1.438E-01 | 8.960E-01  | -1.036E-02 | 8.443E-01  | 0.022686   | 0.245800    |
| 429 | R | 3.280E-03 | 2.505E-03 | -6.269E-01 | -1.878E-24 | 6.269E-04  | 1.253E-02  | -1.003E-04 | -1.704E-01 | -1.223861  | 0.150625    |
| 430 | B | 2.422E-01 | 3.678E-01 | 1.438E-01  | -5.115E-01 | -1.438E-01 | 8.960E-01  | -1.036E-02 | 8.443E-01  | 0.022667   | 0.245806    |
| 431 | B | 3.168E-01 | 1.046E-01 | 3.226E-01  | -4.272E-01 | -3.226E-01 | -8.721E-01 | 3.237E-03  | 8.000E-01  | 0.232108   | 2.075210    |
| 432 | R | 2.016E-02 | 3.055E-02 | -8.846E-01 | -2.170E-13 | 8.846E-03  | 1.576E-01  | -9.079E-04 | 1.676E-02  | -1.182308  | 0.174585    |
| 433 | R | 7.449E-03 | 6.102E-03 | -1.570E-01 | -4.532E-23 | 1.570E-03  | 3.068E-02  | -1.580E-04 | -6.278E-02 | -1.598099  | 0.134060    |
| 434 | B | 3.051E-01 | 9.655E-02 | 3.010E-01  | -3.975E-01 | -3.010E-01 | -8.177E-01 | 5.043E-03  | 7.181E-01  | 0.222345   | 1.912862    |
| 435 | B | 3.117E-01 | 9.971E-02 | 3.118E-01  | -4.115E-01 | -3.118E-01 | -8.485E-01 | 4.918E-03  | 7.244E-01  | 0.197878   | 1.961243    |
| 436 | B | 2.977E-01 | 8.740E-02 | 2.843E-01  | -3.717E-01 | -2.843E-01 | -7.876E-01 | 3.193E-03  | 7.324E-01  | 0.154998   | 1.784978    |
| 437 | B | 7.293E-03 | 5.654E-03 | -7.028E-01 | -4.951E-24 | 7.028E-04  | 2.543E-02  | -2.822E-04 | -1.944E-01 | 1.417580   | 0.194529    |
| 438 | B | 3.040E-01 | 9.791E-02 | 2.989E-01  | -3.968E-01 | -2.989E-01 | -8.041E-01 | 4.843E-03  | 7.238E-01  | 0.238585   | 1.906755    |
| 439 | B | 2.382E-01 | 5.524E-02 | 1.867E-01  | -2.419E-01 | -1.867E-01 | -5.257E-01 | 3.274E-03  | 4.668E-01  | 0.012204   | 1.289984    |
| 440 | B | 8.448E-03 | 5.412E-03 | -1.630E-01 | -3.783E-23 | 1.630E-03  | 2.817E-02  | -1.418E-04 | -8.014E-02 | 1.035086   | 0.152413    |
| 441 | B | 3.121E-01 | 9.902E-02 | 3.130E-01  | -4.120E-01 | -3.130E-01 | -8.558E-01 | 4.525E-03  | 7.307E-01  | 0.201027   | 1.995940    |
| 442 | B | 2.503E-01 | 5.831E-02 | 2.039E-01  | -2.622E-01 | -2.039E-01 | -5.824E-01 | 3.379E-03  | 5.167E-01  | 0.031458   | 1.360800    |
| 443 | B | 3.117E-01 | 9.971E-02 | 3.118E-01  | -4.115E-01 | -3.118E-01 | -8.484E-01 | 4.919E-03  | 7.244E-01  | 0.197884   | 1.961222    |
| 444 | B | 3.122E-01 | 9.872E-02 | 3.129E-01  | -4.117E-01 | -3.129E-01 | -8.569E-01 | 4.606E-03  | 7.282E-01  | 0.196727   | 1.990657    |
| 445 | B | 2.420E-01 | 5.522E-02 | 1.911E-01  | -2.463E-01 | -1.911E-01 | -5.434E-01 | 2.856E-03  | 4.870E-01  | 0.012064   | 1.307203    |
| 446 | R | 2.016E-02 | 3.055E-02 | -8.846E-01 | -2.170E-13 | 8.846E-03  | 1.576E-01  | -9.081E-04 | 1.674E-02  | -1.182312  | 0.174592    |
| 447 | B | 3.097E-01 | 9.948E-02 | 3.082E-01  | -4.077E-01 | -3.082E-01 | -8.349E-01 | 4.659E-03  | 7.252E-01  | 0.204477   | 1.943696    |
| 448 | B | 3.122E-01 | 9.872E-02 | 3.130E-01  | -4.117E-01 | -3.130E-01 | -8.569E-01 | 4.607E-03  | 7.282E-01  | 0.196715   | 1.990723    |
| 449 | B | 3.121E-01 | 9.902E-02 | 3.130E-01  | -4.120E-01 | -3.130E-01 | -8.558E-01 | 4.526E-03  | 7.307E-01  | 0.201026   | 1.995882    |
| 450 | C | 3.124E-03 | 2.530E-03 | -6.789E-01 | -1.851E-24 | 6.789E-04  | 1.284E-02  | -1.041E-04 | -1.580E-01 | -0.733882  | 0.193119    |
| 451 | B | 2.690E-01 | 3.206E-02 | 2.242E-01  | -2.563E-01 | -2.242E-01 | -7.687E-01 | 5.214E-03  | 6.711E-01  | 0.008443   | 1.096039    |
| 452 | A | 9.483E-01 | 1.189E+00 | 3.742E-01  | -4.932E+10 | -3.742E+00 | -1.021E+01 | 1.435E-01  | 6.488E+00  | 21.411879  | -30.497729  |
| 453 | R | 4.212E-03 | 2.844E-03 | -8.036E-01 | -2.040E-24 | 8.036E-04  | 1.459E-02  | -1.367E-04 | -1.493E-01 | -1.623430  | 0.087169    |
| 454 | C | 3.124E-03 | 2.530E-03 | -6.794E-01 | -1.851E-24 | 6.794E-04  | 1.284E-02  | -1.041E-04 | -1.582E-01 | -0.738058  | 0.191396    |
| 455 | B | 2.700E-01 | 3.105E-02 | 2.246E-01  | -2.557E-01 | -2.246E-01 | -7.743E-01 | 5.856E-03  | 6.771E-01  | 0.009385   | 1.087998    |
| 456 | B | 2.190E+00 | 6.869E+00 | 1.425E-01  | -2.112E+21 | -1.425E+01 | -2.954E+01 | 2.934E-01  | 9.645E+00  | 119.469338 | 152.734503  |
| 457 | C | 6.790E-03 | 5.216E-03 | -8.924E-01 | -4.324E-24 | 8.924E-04  | 2.443E-02  | -3.222E-04 | -1.272E-01 | -0.670456  | 0.193991    |
| 458 | C | 6.793E-03 | 5.218E-03 | -8.924E-01 | -4.326E-24 | 8.924E-04  | 2.444E-02  | -3.224E-04 | -1.272E-01 | -0.669447  | 0.194657    |
| 459 | A | 9.618E-01 | 1.215E+00 | 3.807E-01  | -5.022E+10 | -3.807E+00 | -1.037E+01 | 1.198E-01  | 6.393E+00  | 16.511309  | -22.484465  |
| 460 | R | 4.216E-03 | 2.847E-03 | -8.039E-01 | -2.043E-24 | 8.039E-04  | 1.460E-02  | -1.368E-04 | -1.494E-01 | -1.631973  | 0.089792    |
| 461 | R | 8.437E-03 | 6.643E-03 | -8.790E-01 | -5.764E-24 | 8.790E-04  | 3.009E-02  | -4.687E-04 | -1.237E-01 | -1.133156  | 0.030660    |
| 462 | C | 8.427E-03 | 6.504E-03 | -8.026E-01 | -5.702E-24 | 8.026E-04  | 2.923E-02  | -4.610E-04 | -1.229E-01 | -0.902281  | 0.031848    |
| 463 | A | 2.182E+00 | 6.769E+00 | 1.419E-01  | -2.096E+21 | -1.419E+01 | -2.967E+01 | 2.974E-01  | 9.630E+00  | 117.668835 | -208.199190 |
| 464 | C | 4.317E-04 | 3.679E-04 | -1.632E-01 | -2.047E-34 | 1.632E-04  | 2.124E-03  | -1.272E-05 | -1.373E-01 | -0.497493  | 0.161270    |
| 465 | B | 1.253E-03 | 7.057E-04 | -1.863E-01 | -5.194E-34 | 1.863E-04  | 3.568E-03  | -1.864E-05 | -1.251E-01 | 0.305456   | 0.160295    |
| 466 | B | 2.190E+00 | 6.869E+00 | 1.425E-01  | -2.112E+21 | -1.425E+01 | -2.954E+01 | 2.933E-01  | 9.645E+00  | 119.437398 | 152.659663  |
| 467 | B | 2.190E+00 | 6.869E+00 | 1.425E-01  | -2.112E+21 | -1.425E+01 | -2.954E+01 | 2.934E-01  | 9.645E+00  | 119.370202 | 152.850810  |
| 468 | C | 8.428E-03 | 6.505E-03 | -8.019E-01 | -5.703E-24 | 8.019E-04  | 2.923E-02  | -4.610E-04 | -1.229E-01 | -0.901434  | 0.032215    |
| 469 | R | 8.438E-03 | 6.645E-03 | -8.793E-01 | -5.766E-24 | 8.793E-04  | 3.010E-02  | -4.688E-04 | -1.238E-01 | -1.134790  | 0.030995    |
| 470 | A | 9.618E-01 | 1.215E+00 | 3.807E-01  | -5.022E+10 | -3.807E+00 | -1.037E+01 | 1.198E-01  | 6.393E+00  | 16.511251  | -22.483293  |
| 471 | C | 6.792E-03 | 5.217E-03 | -8.923E-01 | -4.325E-24 | 8.923E-04  | 2.444E-02  | -3.223E-04 | -1.272E-01 | -0.669589  | 0.194571    |
| 472 | C | 6.792E-03 | 5.218E-03 | -8.924E-01 | -4.325E-24 | 8.924E-04  | 2.444E-02  | -3.223E-04 | -1.272E-01 | -0.669843  | 0.194327    |
| 473 | B | 2.190E+00 | 6.869E+00 | 1.425E-01  | -2.112E+21 | -1.425E+01 | -2.954E+01 | 2.934E-01  | 9.645E+00  | 119.460873 | 152.740249  |
| 474 | B | 2.700E-01 | 3.105E-02 | 2.246E-01  | -2.557E-01 | -2.246E-01 | -7.743E-01 | 5.856E-03  | 6.771E-01  | 0.009385   | 1.087997    |
| 475 | C | 3.124E-03 | 2.531E-03 | -6.794E-01 | -1.851E-24 | 6.794E-04  | 1.284E-02  | -1.042E-04 | -1.582E-01 | -0.738181  | 0.191432    |
| 476 | C | 8.430E-03 | 6.505E-03 | -8.014E-01 | -5.703E-24 | 8.014E-04  | 2.922E-02  | -4.610E-04 | -1.229E-01 | -0.900608  | 0.032556    |
| 477 | R | 8.440E-03 | 6.647E-03 | -8.796E-01 | -5.767E-24 | 8.796E-04  | 3.011E-02  | -4.689E-04 | -1.238E-01 | -1.136302  | 0.031293    |
| 478 | R | 4.211E-03 | 2.844E-03 | -8.036E-01 | -2.040E-24 | 8.036E-04  | 1.459E-02  | -1.367E-04 | -1.493E-01 | -1.623960  | 0.087673    |
| 479 | C | 3.123E-03 | 2.529E-03 | -6.787E-01 | -1.850E-24 | 6.787E-04  | 1.283E-02  | -1.041E-04 | -1.581E-01 | -0.734410  | 0.192884    |
| 480 | R | 7.207E-03 | 5.671E-03 | -9.680E-01 | -4.703E-24 | 9.680E-04  | 2.656E-02  | -3.163E-04 | -1.584E-01 | -2.460264  | 0.120105    |
| 481 | B | 2.640E-01 | 3.453E-02 | 2.207E-01  | -2.553E-01 | -2.207E-01 | -7.449E-01 | 3.397E-03  | 7.012E-01  | 0.006532   | 1.118153    |
| 482 | B | 2.714E-01 | 3.035E-02 | 2.283E-01  | -2.586E-01 | -2.283E-01 | -7.917E-01 | 2.696E-03  | 7.836E-01  | 0.013917   | 1.112036    |
| 483 | B | 2.640E-01 | 3.453E-02 | 2.207E-01  | -2.553E-01 | -2.207E-01 | -7.449E-01 | 3.396E-03  | 7.012E-01  | 0.006532   | 1.118145    |
| 484 | A | 2.205E+00 | 6.794E+00 | 1.439E-01  | -2.118E+21 | -1.439E+01 | -3.037E+01 | 2.831E-01  | 9.643E+00  | 59.100787  | -169.785555 |
| 485 | B | 2.714E-01 | 3.035E-02 | 2.283E-01  | -2.586E-01 | -2.283E-01 | -7.917E-01 | 2.696E-03  | 7.836E-01  | 0.013915   | 1.112033    |
| 486 | A | 2.205E+00 | 6.794E+00 | 1.439E-01  | -2.118E+21 | -1.439E+01 | -3.037E+01 | 2.831E-01  | 9.643E+00  | 59.059295  | -169.712517 |
| 487 | B | 2.714E-01 | 3.035E-02 | 2.283E-01  | -2.586E-01 | -2.283E-01 | -7.917E-01 | 2.696E-03  | 7.836E-01  | 0.013915   | 1.112034    |
| 488 | A | 2.184E+00 | 6.799E+00 | 1.420E-01  | -2.100E+21 | -1.420E+01 | -2.961E+01 | 3.100E-01  | 9.647E+00  | 176.463595 | -504.505520 |
| 489 | B | 2.640E-01 | 3.453E-02 | 2.207E-01  | -2.553E-01 | -2.207E-01 | -7.448E-01 | 3.396E-03  | 7.012E-01  | 0.006533   | 1.118145    |
| 490 | R | 8.589E-01 | 1.343E+00 | 3.279E-01  | -4.623E+10 | -3.279E+00 | -7.744E+00 | 1.012E-01  | 6.536E+00  | -27.659012 | 24.969069   |
| 491 | B | 2.714E-01 | 3.035E-02 | 2.283E-01  | -2.586E-01 | -2         |            |            |            |            |             |

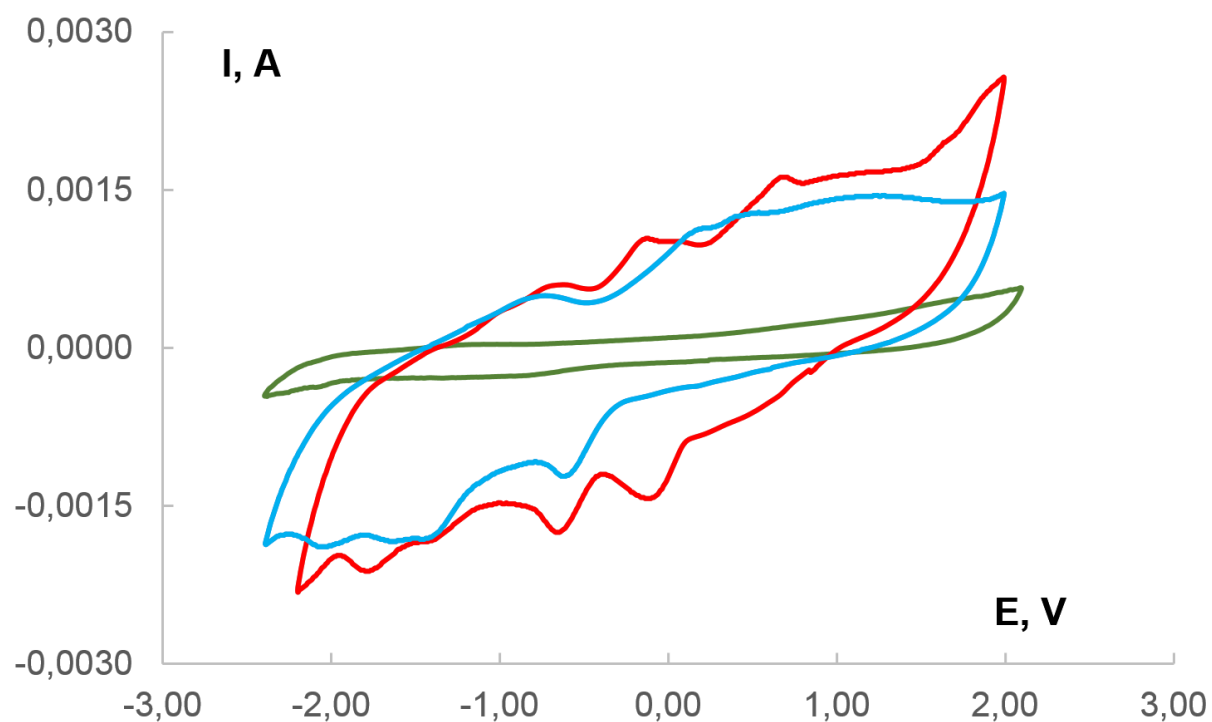

**Figure S2.** Comparison of CVs of paste electrodes in 0.10 M  $\text{Bu}_4\text{NPF}_6$  in acetonitrile at a scan rate of 20 mV/s: red curve - complex in paste, blue curve - precursor, green curve - background (blank).

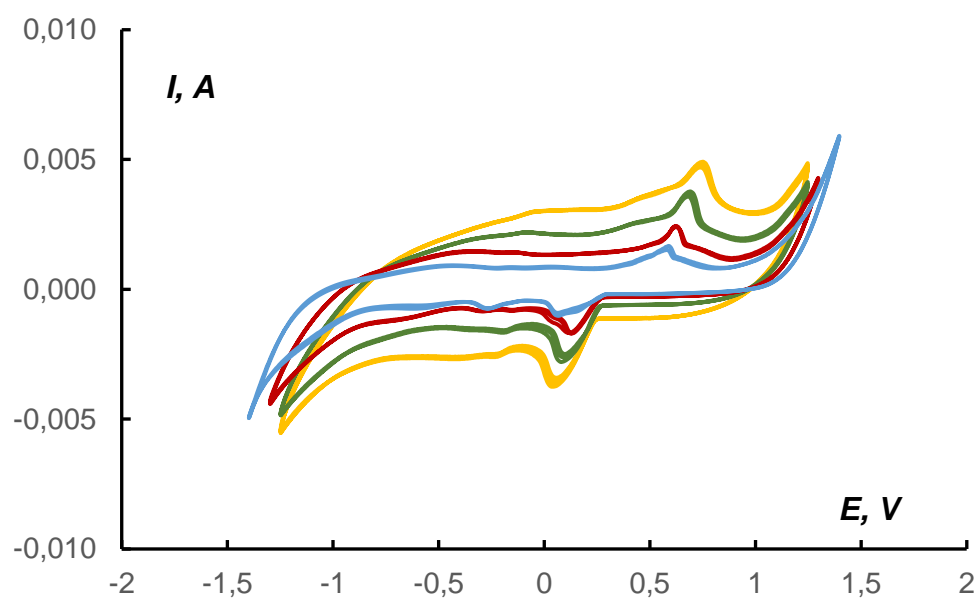

**Figure S3.** Reproducibility of CV curves (2-4 cycles) for **1** in the paste electrode in aqueous solution of 1.0 M KHCO<sub>3</sub> at different scan rates (mV/s): blue line – 10, red – 20, green – 50, yellow – 100.

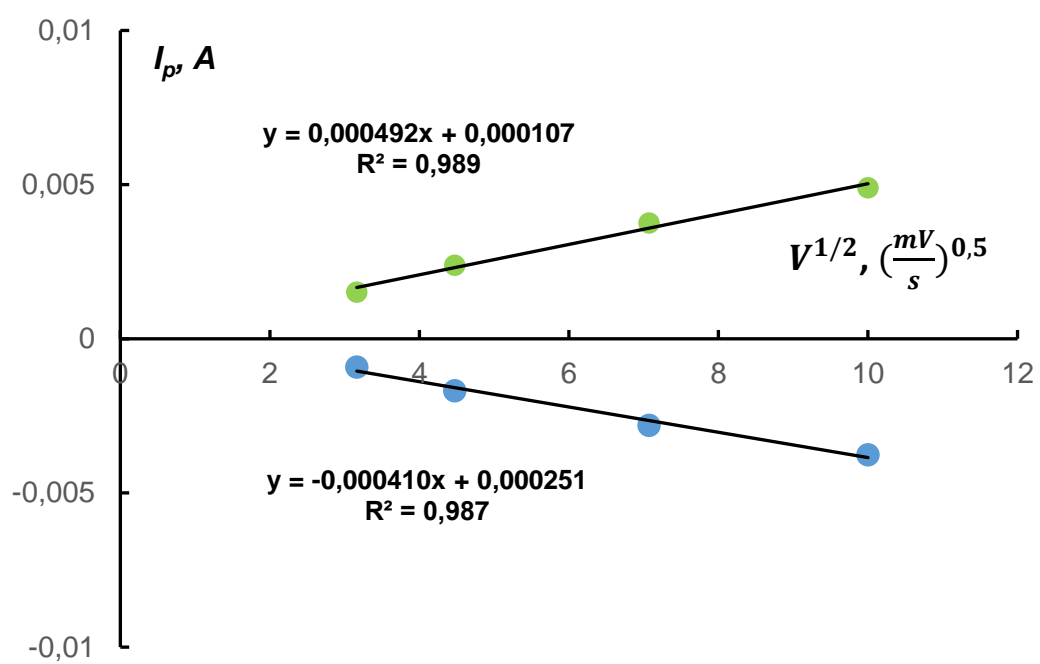

**Figure S4.** The dependences of peak currents on the square root of scan rate for anodic (green circles) and cathodic (blue circles) peak currents. The primary data presented in Fig. S3.

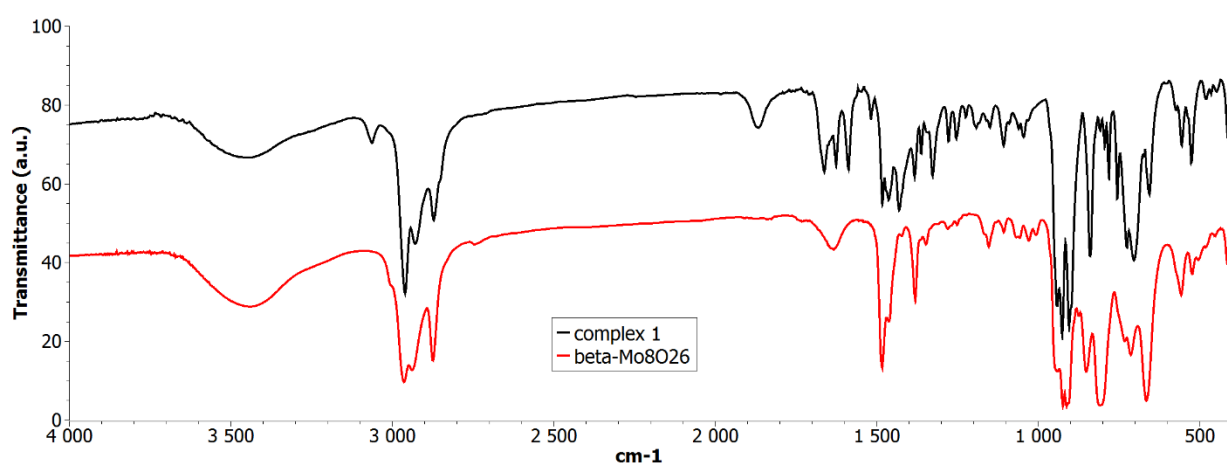

Figure S5. IR spectra of 1 (black curve) and  $(\text{Bu}_4\text{N})_4[\beta\text{-Mo}_8\text{O}_{26}]$  (red curve).

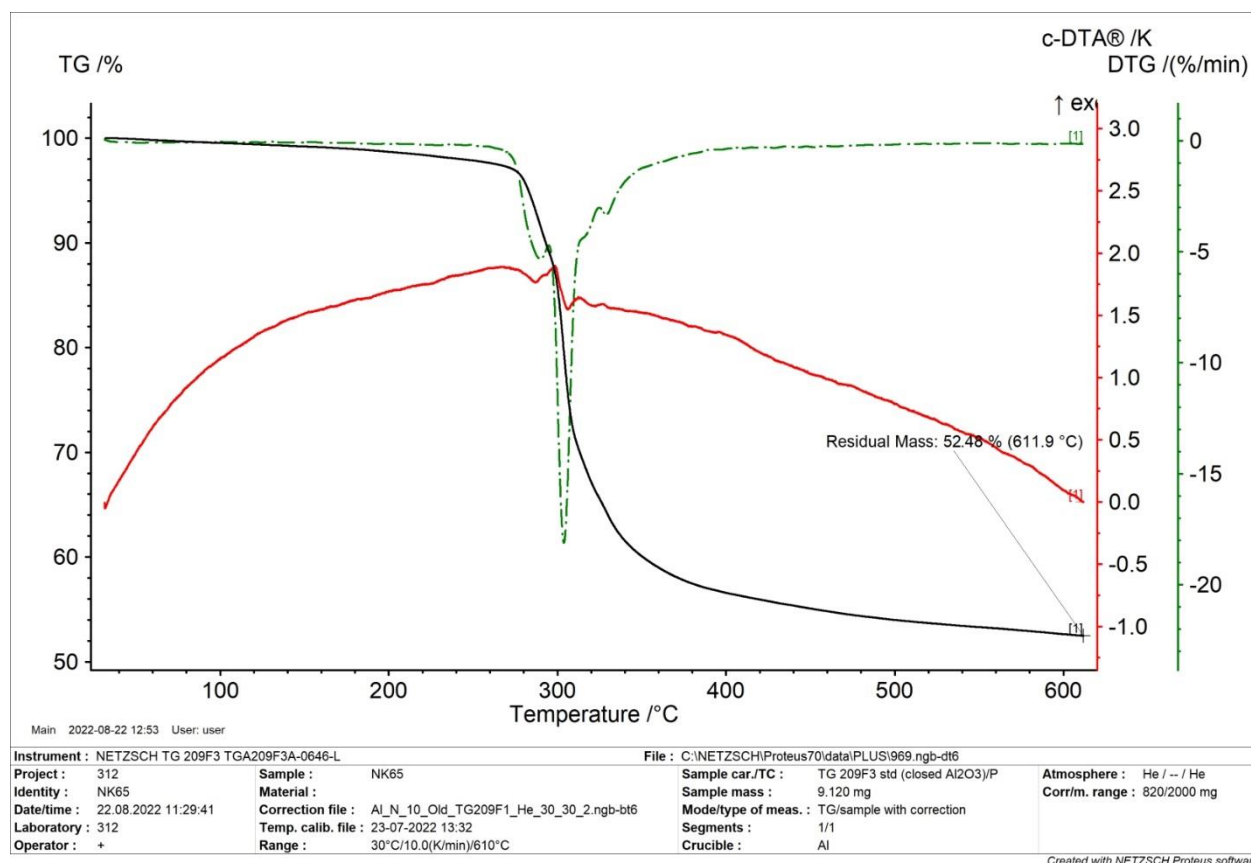

Figure S6. TGA data for 1.
